# Supplementary material for: In Vitro Mineralisation of Tissue-Engineered Cartilage Reduces Endothelial Cell Migration, Proliferation and Tube Formation
Source: MDPI journal article supplement (doi:10.3390/cells12081202), 2023-04-20
Supplement: s1 [file Raw data file.xlsx]

## Sheet: Figure 1
	Figure 1b, Calcium assay of donor 1 and 2
	Donor 1, raw Ca2+ values (mM)												Donor 1, normalized Ca2+ concentration
	Group name	Day	3	7	10	14	17	21	24	28	31		Group name	Day	3	7	10	14	17	21	24	28	31
	TGF 4w + BGP 2w		2.72777	2.78772	1.76115	2.07641	2.41605	1.83791	1.82907	1.78578	1.18477		TGF 4w + BGP 2w		1.09229	0.990639	0.998674	0.89483	0.986292	1.02155	0.930566	0.983681	0.880143
	TGF 2w + BGP 2w		2.67713	2.8252	1.79227	2.1763	2.27515	1.05959	0.521528	0.397696	0.178171		TGF 2w + BGP 2w		1.07201	1.00396	1.01632	0.937877	0.92877	0.588941	0.265336	0.219067	0.132359
	TGF 2w + BGP 3w		2.63546	2.72758	1.61466	2.21169	2.21374	1.72801	0.687355	0.417098	0.1683		TGF 2w + BGP 3w		1.05533	0.969268	0.915608	0.953132	0.903702	0.960463	0.349702	0.229754	0.125026
	TGF 2w + BGP 4w		2.62192	2.82665	1.65851	2.27369	2.27722	1.81031	0.63098	0.348177	0.160205		TGF 2w + BGP 4w		1.0499	1.00447	0.940469	0.97985	0.929615	1.00621	0.321021	0.19179	0.119012
	TGF 4w		2.60585	2.87614	1.78987	2.29516	2.40409	1.8598	1.98468	1.74101	1.2996		TGF 4w		1.04347	1.02206	1.01496	0.989104	0.98141	1.03371	1.00974	0.959016	0.965446
	Blank medium (defined as 1 for normalization)		2.49729	2.81406	1.76349	2.32045	2.44963	1.79915	1.96554	1.81541	1.34612		Blank medium (defined as 1 for normalization)		1	1	1	1	1	1	1	1	1
	Donor 2, raw Ca2+ values (mM)
	Group name	Day	3	7	10	14	17	21	24	28	31		Donor 2, normalized Ca2+ concentration
	TGF 4w + BGP 2w		2.60258	2.85374	1.8578	1.90601	2.11433	1.77067	0.97526	0.783113	0.445378		Group name	Day	3	7	10	14	17	21	24	28	31
	TGF 2w + BGP 2w		2.56558	2.81251	1.87627	1.96073	2.1814	2.11078	0.858992	0.603263	0.449919		TGF 4w + BGP 2w		1.1174	0.978337	1.02564	0.950742	0.876905	0.728229	0.409092	0.46486	0.390732
	TGF 2w + BGP 3w		2.51756	2.50718	1.80947	2.05562	1.91677	0.429877	0.459942	0.372525	0.281324		TGF 2w + BGP 2w		1.10152	0.964204	1.03584	0.978036	0.904721	0.868107	0.360321	0.3581	0.394717
	TGF 2w + BGP 4w		2.48832	3.00302	1.83672	1.91734	1.2865	1.40772	0.702206	0.497948	0.407055		TGF 2w + BGP 3w		1.0809	0.859529	0.998964	1.02537	0.794971	0.176797	0.192932	0.221133	0.246807
	TGF 4w		2.53672	2.85467	1.87954	2.04429	2.34899	2.40901	2.38565	1.67436	1.19286		TGF 2w + BGP 4w		1.06835	1.02951	1.01401	0.956393	0.533569	0.578957	0.294554	0.295585	0.357112
	Blank medium (defined as 1 for normalization)		2.32913	2.91693	1.81135	2.00476	2.41113	2.43148	2.38396	1.68462	1.13985		TGF 4w		1.08913	0.978658	1.03765	1.01972	0.97423	0.990762	1.00071	0.99391	1.0465
													Blank medium (defined as 1 for normalization)		1	1	1	1	1	1	1	1	1
	Figure 1d, Minerlaisaiton quantification of donor 1 and 2								Values in the chart										Values in the chart
	Donor	Condition	Pellet	section	Timepoint	Pellet area (μm2)	Mineralised area (μm2)	Mineralisation percentage each field (%)	Averaged mineralisation for each pellet (%)		Donor	Condition	Pellet	section	Timepoint	Pellet area (μm2)	Mineralised area (μm2)	Mineralisation percentage each field (%)	Averaged mineralisation for each pellet (%)
	Donor 1	TGF (4w) + BGP (2w)	1	1	Day 21	853297	177.616	0.0208153	0.133476		Donor 2	TGF (4w) + BGP (2w)	1	1	Day 21	2.71829e+06	9842.45	0.362083	0.189928
	Donor 1	TGF (4w) + BGP (2w)	2	1	Day 21	1.21179e+06	3188.91	0.263158	2.30007		Donor 2	TGF (4w) + BGP (2w)	2	1	Day 21	2.85072e+06	15477.9	0.542946	0.208369
	Donor 1	TGF (4w) + BGP (2w)	3	1	Day 21	1.09401e+06	541.766	0.049521	0.436598		Donor 2	TGF (4w) + BGP (2w)	3	1	Day 21	2.69433e+06	15288.3	0.567427	0.239646
	Donor 1	TGF (4w) + BGP (2w)	1	2	Day 21	1.47668e+06	4172.12	0.282534			Donor 2	TGF (4w) + BGP (2w)	1	2	Day 21	2.68441e+06	5546.97	0.206637
	Donor 1	TGF (4w) + BGP (2w)	2	2	Day 21	1.42822e+06	49489.4	3.46511			Donor 2	TGF (4w) + BGP (2w)	2	2	Day 21	2.63082e+06	1087.99	0.0413556
	Donor 1	TGF (4w) + BGP (2w)	3	2	Day 21	1.5323e+06	11673.6	0.761836			Donor 2	TGF (4w) + BGP (2w)	3	2	Day 21	2.1521e+06	983.948	0.0457203
	Donor 1	TGF (4w) + BGP (2w)	1	3	Day 21	1.5831e+06	1536.86	0.0970793			Donor 2	TGF (4w) + BGP (2w)	1	3	Day 21	2.86539e+06	30.47	0.00106338
	Donor 1	TGF (4w) + BGP (2w)	2	3	Day 21	1.4893e+06	47239.9	3.17195			Donor 2	TGF (4w) + BGP (2w)	2	3	Day 21	2.90858e+06	1186.83	0.0408044
	Donor 1	TGF (4w) + BGP (2w)	3	3	Day 21	1.57911e+06	7870.84	0.498436			Donor 2	TGF (4w) + BGP (2w)	3	3	Day 21	2.77339e+06	2934.01	0.105791
	Donor 1	TGF (2w) + BGP (2w)	1	1	Day 21	1.31424e+06	19369.8	1.47384	1.2079		Donor 2	TGF (2w) + BGP (2w)	1	1	Day 21	2.05519e+06	368.609	0.0179355	0.0746075
	Donor 1	TGF (2w) + BGP (2w)	2	1	Day 21	1.12594e+06	272796	24.2283	22.1431		Donor 2	TGF (2w) + BGP (2w)	2	1	Day 21	2.56923e+06	236865	9.21928	9.53306
	Donor 1	TGF (2w) + BGP (2w)	3	1	Day 21	1.05313e+06	275.713	0.0261802	0.0503175		Donor 2	TGF (2w) + BGP (2w)	3	1	Day 21	2.97607e+06	48884.5	1.64258	2.57553
	Donor 1	TGF (2w) + BGP (2w)	1	2	Day 21	1.38168e+06	7404.88	0.535934			Donor 2	TGF (2w) + BGP (2w)	1	2	Day 21	1.70681e+06	3347.21	0.196109
	Donor 1	TGF (2w) + BGP (2w)	2	2	Day 21	1.35848e+06	241579	17.7831			Donor 2	TGF (2w) + BGP (2w)	2	2	Day 21	2.44202e+06	305495	12.5099
	Donor 1	TGF (2w) + BGP (2w)	3	2	Day 21	1.33323e+06	1545.78	0.115942			Donor 2	TGF (2w) + BGP (2w)	3	2	Day 21	2.87651e+06	126575	4.40029
	Donor 1	TGF (2w) + BGP (2w)	1	3	Day 21	1.24194e+06	20043.8	1.61391			Donor 2	TGF (2w) + BGP (2w)	1	3	Day 21	2.53083e+06	247.473	0.00977833
	Donor 1	TGF (2w) + BGP (2w)	2	3	Day 21	1.17155e+06	286069	24.4179			Donor 2	TGF (2w) + BGP (2w)	2	3	Day 21	2.84173e+06	195227	6.87
	Donor 1	TGF (2w) + BGP (2w)	3	3	Day 21	1.1194e+06	98.841	0.00882979			Donor 2	TGF (2w) + BGP (2w)	3	3	Day 21	3.2319e+06	54415.9	1.68371
	Donor 1	TGF (2w) + BGP (3w)	1	1	Day 21	1.36926e+06	250209	18.2733	22.7796		Donor 2	TGF (2w) + BGP (3w)	1	1	Day 21	2.48832e+06	81828.2	3.28848	2.71329
	Donor 1	TGF (2w) + BGP (3w)	2	1	Day 21	1.56597e+06	209929	13.4057	12.7325		Donor 2	TGF (2w) + BGP (3w)	2	1	Day 21	2.7579e+06	46464.8	1.68479	0.717953
	Donor 1	TGF (2w) + BGP (3w)	3	1	Day 21	1.31054e+06	134754	10.2823	13.6607		Donor 2	TGF (2w) + BGP (3w)	3	1	Day 21	2.5944e+06	7881.99	0.303807	0.271464
	Donor 1	TGF (2w) + BGP (3w)	1	2	Day 21	1.17082e+06	453167	38.7051			Donor 2	TGF (2w) + BGP (3w)	1	2	Day 21	2.48483e+06	57835.9	2.32756
	Donor 1	TGF (2w) + BGP (3w)	2	2	Day 21	1.23911e+06	206574	16.6711			Donor 2	TGF (2w) + BGP (3w)	2	2	Day 21	2.20953e+06	3509.96	0.158855
	Donor 1	TGF (2w) + BGP (3w)	3	2	Day 21	1.41056e+06	324639	23.015			Donor 2	TGF (2w) + BGP (3w)	3	2	Day 21	2.6247e+06	8495.09	0.32366
	Donor 1	TGF (2w) + BGP (3w)	1	3	Day 21	1.56891e+06	178235	11.3604			Donor 2	TGF (2w) + BGP (3w)	1	3	Day 21	2.68821e+06	67845.6	2.52382
	Donor 1	TGF (2w) + BGP (3w)	2	3	Day 21	1.52764e+06	124057	8.12081			Donor 2	TGF (2w) + BGP (3w)	2	3	Day 21	2.68025e+06	8314.51	0.310213
	Donor 1	TGF (2w) + BGP (3w)	3	3	Day 21	1.36563e+06	104946	7.68485			Donor 2	TGF (2w) + BGP (3w)	3	3	Day 21	2.41803e+06	4519.92	0.186926
	Donor 1	TGF (2w) + BGP (4w)	1	1	Day 21	1.28694e+06	306.183	0.0237916	0.0329891		Donor 2	TGF (2w) + BGP (4w)	1	1	Day 21	2.31667e+06	353.002	0.0152374	1.3746
	Donor 1	TGF (2w) + BGP (4w)	2	1	Day 21	1.0254e+06	196.195	0.0191336	0.018784		Donor 2	TGF (2w) + BGP (4w)	2	1	Day 21	2.43721e+06	38123.5	1.56423	0.954894
	Donor 1	TGF (2w) + BGP (4w)	3	1	Day 21	1.4003e+06	210.315	0.0150193	0.0520764		Donor 2	TGF (2w) + BGP (4w)	3	1	Day 21	2.0691e+06	82221.3	3.97378	2.66351
	Donor 1	TGF (2w) + BGP (4w)	1	2	Day 21	918407	66.141	0.00720171			Donor 2	TGF (2w) + BGP (4w)	1	2	Day 21	2.66425e+06	63073	2.36738
	Donor 1	TGF (2w) + BGP (4w)	2	2	Day 21	1.03112e+06	83.977	0.00814426			Donor 2	TGF (2w) + BGP (4w)	2	2	Day 21	2.83179e+06	24732.5	0.873385
	Donor 1	TGF (2w) + BGP (4w)	3	2	Day 21	1.23204e+06	385.702	0.031306			Donor 2	TGF (2w) + BGP (4w)	3	2	Day 21	2.35348e+06	64363.1	2.73481
	Donor 1	TGF (2w) + BGP (4w)	1	3	Day 21	1.5339e+06	1042.66	0.0679741			Donor 2	TGF (2w) + BGP (4w)	1	3	Day 21	2.76005e+06	48057.4	1.74118
	Donor 1	TGF (2w) + BGP (4w)	2	3	Day 21	1.52087e+06	442.182	0.0290743			Donor 2	TGF (2w) + BGP (4w)	2	3	Day 21	2.95477e+06	12618.9	0.427069
	Donor 1	TGF (2w) + BGP (4w)	3	3	Day 21	1.23676e+06	1359.24	0.109904			Donor 2	TGF (2w) + BGP (4w)	3	3	Day 21	2.80254e+06	35926.7	1.28194
	Donor 1	TGF (4w)	1	1	Day 21	1.04309e+06	81.748	0.00783708	0.0286173		Donor 2	TGF (4w)	1	1	Day 21	2.12359e+06	12169.3	0.573053	0.274212
	Donor 1	TGF (4w)	2	1	Day 21	1.01762e+06	94.382	0.0092748	0.0183412		Donor 2	TGF (4w)	2	1	Day 21	3.20669e+06	9298.45	0.289971	0.737667
	Donor 1	TGF (4w)	3	1	Day 21	825280	118.906	0.014408	0.0115679		Donor 2	TGF (4w)	3	1	Day 21	3.42218e+06	8817.63	0.257661	0.64256
	Donor 1	TGF (4w)	1	2	Day 21	1.49693e+06	957.937	0.0639934			Donor 2	TGF (4w)	1	2	Day 21	3.26955e+06	438.466	0.0134106
	Donor 1	TGF (4w)	2	2	Day 21	1.26232e+06	408.74	0.0323801			Donor 2	TGF (4w)	2	2	Day 21	2.47569e+06	2224.29	0.089845
	Donor 1	TGF (4w)	3	2	Day 21	990260	30.47	0.00307697			Donor 2	TGF (4w)	3	2	Day 21	2.35185e+06	167.955	0.00714139
	Donor 1	TGF (4w)	1	3	Day 21	1.62187e+06	227.408	0.0140214			Donor 2	TGF (4w)	1	3	Day 21	2.35183e+06	5554.4	0.236174
	Donor 1	TGF (4w)	2	3	Day 21	1.462e+06	195.452	0.0133688			Donor 2	TGF (4w)	2	3	Day 21	2.87761e+06	52751.9	1.83319
	Donor 1	TGF (4w)	3	3	Day 21	1.14805e+06	197.681	0.0172189			Donor 2	TGF (4w)	3	3	Day 21	3.47194e+06	57734.1	1.66288
	Donor 1	TGF (4w) + BGP (2w)	1	1	Day 28	1.58432e+06	47794.3	3.0167	2.29523		Donor 2	TGF (4w) + BGP (2w)	1	1	Day 28	942508	11554	1.22587	0.737212
	Donor 1	TGF (4w) + BGP (2w)	2	1	Day 28	1.53446e+06	89502.8	5.83285	6.62251		Donor 2	TGF (4w) + BGP (2w)	2	1	Day 28	975304	113.704	0.0116583	0.0162911
	Donor 1	TGF (4w) + BGP (2w)	3	1	Day 28	1.99019e+06	1214.33	0.0610157	0.0271945		Donor 2	TGF (4w) + BGP (2w)	3	1	Day 28	2.61139e+06	2792.81	0.106947	0.172243
	Donor 1	TGF (4w) + BGP (2w)	1	2	Day 28	1.46053e+06	28897.9	1.97859			Donor 2	TGF (4w) + BGP (2w)	1	2	Day 28	736743	156.807	0.0212838
	Donor 1	TGF (4w) + BGP (2w)	2	2	Day 28	1.56837e+06	124971	7.96824			Donor 2	TGF (4w) + BGP (2w)	2	2	Day 28	823511	114.447	0.0138975
	Donor 1	TGF (4w) + BGP (2w)	3	2	Day 28	1.81701e+06	290.577	0.015992			Donor 2	TGF (4w) + BGP (2w)	3	2	Day 28	2.54304e+06	1862.37	0.0732338
	Donor 1	TGF (4w) + BGP (2w)	1	3	Day 28	1.60846e+06	30406.5	1.89041			Donor 2	TGF (4w) + BGP (2w)	1	3	Day 28	1.07644e+06	10382	0.964479
	Donor 1	TGF (4w) + BGP (2w)	2	3	Day 28	1.53081e+06	92865.6	6.06643			Donor 2	TGF (4w) + BGP (2w)	2	3	Day 28	1.17286e+06	273.484	0.0233176
	Donor 1	TGF (4w) + BGP (2w)	3	3	Day 28	1.93264e+06	88.436	0.00457592			Donor 2	TGF (4w) + BGP (2w)	3	3	Day 28	2.23358e+06	7517.09	0.336549
	Donor 1	TGF (2w) + BGP (2w)	1	1	Day 28	1.75792e+06	134527	7.65264	9.35534		Donor 2	TGF (2w) + BGP (2w)	1	1	Day 28	2.83209e+06	363143	12.8224	9.23176
	Donor 1	TGF (2w) + BGP (2w)	2	1	Day 28	1.4742e+06	15431.8	1.04679	1.02141		Donor 2	TGF (2w) + BGP (2w)	2	1	Day 28	2.72627e+06	166904	6.12207	11.5032
	Donor 1	TGF (2w) + BGP (2w)	3	1	Day 28	1.07114e+06	984.691	0.091929	0.135124		Donor 2	TGF (2w) + BGP (2w)	3	1	Day 28	2.50733e+06	279585	11.1507	11.3136
	Donor 1	TGF (2w) + BGP (2w)	1	2	Day 28	2.00533e+06	196902	9.81894			Donor 2	TGF (2w) + BGP (2w)	1	2	Day 28	2.98048e+06	168555	5.65531
	Donor 1	TGF (2w) + BGP (2w)	2	2	Day 28	1.54663e+06	18981.1	1.22726			Donor 2	TGF (2w) + BGP (2w)	2	2	Day 28	2.93544e+06	365527	12.4522
	Donor 1	TGF (2w) + BGP (2w)	3	2	Day 28	1.09909e+06	1478.15	0.134488			Donor 2	TGF (2w) + BGP (2w)	3	2	Day 28	2.61932e+06	239048	9.12633
	Donor 1	TGF (2w) + BGP (2w)	1	3	Day 28	1.984e+06	210194	10.5944			Donor 2	TGF (2w) + BGP (2w)	1	3	Day 28	2.80246e+06	258317	9.21753
	Donor 1	TGF (2w) + BGP (2w)	2	3	Day 28	1.54621e+06	12217.6	0.790165			Donor 2	TGF (2w) + BGP (2w)	2	3	Day 28	2.90792e+06	463384	15.9353
	Donor 1	TGF (2w) + BGP (2w)	3	3	Day 28	1.09385e+06	1957.49	0.178954			Donor 2	TGF (2w) + BGP (2w)	3	3	Day 28	2.44615e+06	334238	13.6638
	Donor 1	TGF (2w) + BGP (3w)	1	1	Day 28	928248	1471.46	0.158521	3.05154		Donor 2	TGF (2w) + BGP (3w)	1	1	Day 28	2.67744e+06	269259	10.0566	15.2054
	Donor 1	TGF (2w) + BGP (3w)	2	1	Day 28	1.65677e+06	374597	22.61	24.1992		Donor 2	TGF (2w) + BGP (3w)	2	1	Day 28	2.67084e+06	397656	14.8888	12.504
	Donor 1	TGF (2w) + BGP (3w)	3	1	Day 28	1.30386e+06	113863	8.73274	9.1658		Donor 2	TGF (2w) + BGP (3w)	3	1	Day 28	2.70111e+06	441419	16.3421	14.0895
	Donor 1	TGF (2w) + BGP (3w)	1	2	Day 28	767513	2297.86	0.299391			Donor 2	TGF (2w) + BGP (3w)	1	2	Day 28	2.67591e+06	323343	12.0835
	Donor 1	TGF (2w) + BGP (3w)	2	2	Day 28	1.54118e+06	380179	24.668			Donor 2	TGF (2w) + BGP (3w)	2	2	Day 28	2.69556e+06	199695	7.40831
	Donor 1	TGF (2w) + BGP (3w)	3	2	Day 28	1.20655e+06	132083	10.9472			Donor 2	TGF (2w) + BGP (3w)	3	2	Day 28	2.63352e+06	373319	14.1757
	Donor 1	TGF (2w) + BGP (3w)	1	3	Day 28	1.0529e+06	91568.1	8.69671			Donor 2	TGF (2w) + BGP (3w)	1	3	Day 28	2.55534e+06	599890	23.476
	Donor 1	TGF (2w) + BGP (3w)	2	3	Day 28	1.5022e+06	380352	25.3197			Donor 2	TGF (2w) + BGP (3w)	2	3	Day 28	2.48887e+06	378678	15.2148
	Donor 1	TGF (2w) + BGP (3w)	3	3	Day 28	1.26643e+06	99003.4	7.81751			Donor 2	TGF (2w) + BGP (3w)	3	3	Day 28	2.45285e+06	288228	11.7508
	Donor 1	TGF (2w) + BGP (4w)	1	1	Day 28	1.22512e+06	28592.4	2.33385	1.8054		Donor 2	TGF (2w) + BGP (4w)	1	1	Day 28	3.13012e+06	397794	12.7086	12.4958
	Donor 1	TGF (2w) + BGP (4w)	2	1	Day 28	1.29005e+06	126113	9.77578	14.1301		Donor 2	TGF (2w) + BGP (4w)	2	1	Day 28	2.52842e+06	428196	16.9353	16.0318
	Donor 1	TGF (2w) + BGP (4w)	3	1	Day 28	1.35191e+06	256334	18.9609	11.1751		Donor 2	TGF (2w) + BGP (4w)	3	1	Day 28	2.4842e+06	306943	12.3558	13.2403
	Donor 1	TGF (2w) + BGP (4w)	1	2	Day 28	1.28308e+06	25010.4	1.94925			Donor 2	TGF (2w) + BGP (4w)	1	2	Day 28	2.82081e+06	389002	13.7904
	Donor 1	TGF (2w) + BGP (4w)	2	2	Day 28	1.44311e+06	242915	16.8327			Donor 2	TGF (2w) + BGP (4w)	2	2	Day 28	2.44846e+06	427395	17.4557
	Donor 1	TGF (2w) + BGP (4w)	3	2	Day 28	1.31182e+06	76189.8	5.80794			Donor 2	TGF (2w) + BGP (4w)	3	2	Day 28	2.5179e+06	334052	13.2671
	Donor 1	TGF (2w) + BGP (4w)	1	3	Day 28	1.23383e+06	13980.4	1.13309			Donor 2	TGF (2w) + BGP (4w)	1	3	Day 28	3.28676e+06	361162	10.9884
	Donor 1	TGF (2w) + BGP (4w)	2	3	Day 28	1.41661e+06	223568	15.7819			Donor 2	TGF (2w) + BGP (4w)	2	3	Day 28	2.86352e+06	392429	13.7044
	Donor 1	TGF (2w) + BGP (4w)	3	3	Day 28	1.26488e+06	110759	8.75649			Donor 2	TGF (2w) + BGP (4w)	3	3	Day 28	2.86761e+06	404278	14.0981
	Donor 1	TGF (4w)	1	1	Day 28	1.78721e+06	86.95	0.00486513	0.22224		Donor 2	TGF (4w)	1	1	Day 28	2.03968e+06	1446.94	0.0709393	0.105274
	Donor 1	TGF (4w)	2	1	Day 28	1.76841e+06	5671.82	0.320731	0.131454		Donor 2	TGF (4w)	2	1	Day 28	3.28127e+06	7531.96	0.229544	0.118421
	Donor 1	TGF (4w)	3	1	Day 28	1.88851e+06	615.339	0.0325833	0.0892138		Donor 2	TGF (4w)	3	1	Day 28	3.55079e+06	15150.9	0.42669	0.239538
	Donor 1	TGF (4w)	1	2	Day 28	1.33629e+06	8634.81	0.646178			Donor 2	TGF (4w)	1	2	Day 28	2.30926e+06	5584.13	0.241815
	Donor 1	TGF (4w)	2	2	Day 28	1.31742e+06	635.404	0.0482309			Donor 2	TGF (4w)	2	2	Day 28	3.2397e+06	274.227	0.00846459
	Donor 1	TGF (4w)	3	2	Day 28	1.49926e+06	2418.99	0.161346			Donor 2	TGF (4w)	3	2	Day 28	3.71349e+06	9786.71	0.263545
	Donor 1	TGF (4w)	1	3	Day 28	1.76809e+06	277.2	0.0156779			Donor 2	TGF (4w)	1	3	Day 28	2.71242e+06	83.234	0.00306862
	Donor 1	TGF (4w)	2	3	Day 28	1.71161e+06	434.75	0.0254001			Donor 2	TGF (4w)	2	3	Day 28	2.53968e+06	2977.85	0.117253
	Donor 1	TGF (4w)	3	3	Day 28	1.65144e+06	1217.3	0.0737115			Donor 2	TGF (4w)	3	3	Day 28	3.2811e+06	931.183	0.0283802

## Sheet: Figure 2
	Figure 2b, Calcium assay of donor 3, 4 and 5
		Donor 3	days of culture:										Donor 4	days of culture:										Donor 5	days of culture:
	Ca2+ raw values mM	Day	7	10	14	17	21	24	28			Ca2+ raw values mM	Day	7	10	14	17	21	24	28			Ca2+ raw values mM	Day	7	10	14	17	21	24	28
	Group name	Condition name										Group name	Condition name										Group name	Condition name
		chondro medium	2.43705	2.27193	2.11712	1.96397	2.05037	2.02649	2.0693				chondro medium	1.89842	1.92062	1.74864	2.04589	2.04559	2.00549	1.88244				chondro medium	1.92512	1.92512	1.92512	2.04751	1.82738	1.8435	1.95606
	TGF (4w)	pellets chondro	2.64474	2.72504	1.98917	2.00354	2.10087	1.91667	2.00389			TGF (4w)	pellets chondro	1.9425	1.89376	1.76069	2.01039	2.00759	2.07273	1.88964			TGF (4w)	pellets chondro	1.53797	1.85026	1.75523	1.9504	1.91828	1.9112	2.00617
		mineralized medium	2.43705	2.37581	2.10786	1.97333	2.04119	2.09908	2.0428				mineralized medium	1.89842	1.85114	1.79509	1.99795	2.02894	2.00573	1.94188				mineralized medium	1.92512	1.92512	1.92512	2.04751	1.82738	1.8435	1.95606
	TGF (2w) + BGP	pellets mineralized	2.64474	1.86019	0.808015	0.532144	0.528763	0.713581	0.607904			TGF (2w) + BGP	pellets mineralized	1.9425	1.84755	1.37078	0.848234	0.715852	0.548475	0.592413			TGF (2w) + BGP	pellets mineralized	1.53797	1.91713	1.81447	1.88531	0.398778	0.379266	0.46632
		non-mineralized medium	2.43705	2.27193	2.11712	1.99067	2.12377	1.99383	1.95885				non-mineralized medium	1.89842	1.92062	1.74864	1.98053	2.01302	2.02243	1.96938				non-mineralized medium	1.92512	1.92512	1.92512	2.04751	1.82738	1.8435	1.95606
	TGF (2w)	pellets non-mineralized	2.64474	2.72504	1.98917	1.9411	2.02414	2.00623	1.9936			TGF (2w)	pellets non-mineralized	1.9425	1.89376	1.76069	1.88032	1.99749	2.05969	1.8598			TGF (2w)	pellets non-mineralized	1.53797	1.85026	1.75523	2.10542	2.05525	1.87832	2.07557
	Normalized Ca2+ values	Day	7	10	14	17	21	24	28			Normalized Ca2+ values	Day	7	10	14	17	21	24	28			Normalized Ca2+ values	Day	7	10	14	17	21	24	28
	Group name	Condition name										Group name	Condition name										Group name	Condition name
		chondro medium	1	1	1	1	1	1	1				chondro medium	1	1	1	1	1	1	1				chondro medium	1	1	1	1	1	1	1
	TGF (4w)	pellets chondro	1.08522	1.19944	0.939563	1.02014	1.02463	0.945804	0.96839			TGF (4w)	pellets chondro	1.02321	0.986012	1.00689	0.982648	0.98142	1.03353	1.00382			TGF (4w)	pellets chondro	0.798893	0.961116	0.911748	0.952569	1.04974	1.03672	1.02562
		mineralized medium	1	1	1	1	1	1	1				mineralized medium	1	1	1	1	1	1	1				mineralized medium	1	1	1	1	1	1	1
	TGF (2w) + BGP	pellets mineralized	1.08522	0.782972	0.383333	0.269668	0.259046	0.33995	0.297584			TGF (2w) + BGP	pellets mineralized	1.02321	0.998058	0.763623	0.424552	0.352821	0.273454	0.305073			TGF (2w) + BGP	pellets mineralized	0.798893	0.995849	0.942524	0.920784	0.218224	0.205731	0.238398
		non-mineralized medium	1	1	1	1	1	1	1				non-mineralized medium	1	1	1	1	1	1	1				non-mineralized medium	1	1	1	1	1	1	1
	TGF (2w)	pellets non-mineralized	1.08522	1.19944	0.939563	0.975095	0.95309	1.00622	1.01774			TGF (2w)	pellets non-mineralized	1.02321	0.986012	1.00689	0.949404	0.992285	1.01842	0.944354			TGF (2w)	pellets non-mineralized	0.798893	0.961116	0.911748	1.02828	1.1247	1.01889	1.0611
	Figure 2d, Mineralisation quantification of donor 3, 4 and 5								Values in the final chart										Values in the final chart										Values in the final chart
	Donor	Condition	Pellet	section	Timepoint	Pellet area (μm2)	Mineralised area (μm2)	Mineralisation percentage each field (%)	Averaged mineralisation for each pellet (%)		Donor	Condition	Pellet	section	Timepoint	Pellet area (μm2)	Mineralised area (μm2)	Mineralisation percentage each field (%)	Averaged mineralisation for each pellet (%)		Donor	Condition	Pellet	section	Timepoint	Pellet area (μm2)	Mineralised area (μm2)	Mineralisation percentage each field (%)	Averaged mineralisation for each pellet (%)
	Donor 3	TGF (4w)	1	1	day7	970615	1258.17	0.129627	0.292043		Donor 4	TGF (4w)	1	1	day7	641879	1263.38	0.196825	0.13896		Donor 5	TGF (4w)	1	1	day7	601322	25.268	0.00420207	0.054288
	Donor 3	TGF (4w)	2	1	day7	839303	1070.15	0.127505	0.229308		Donor 4	TGF (4w)	2	1	day7	275620	1071.64	0.388811	0.144048		Donor 5	TGF (4w)	2	1	day7	383011	118.906	0.031045	0.09054
	Donor 3	TGF (4w)	3	1	day7	977285	39.388	0.00403035	0.167439		Donor 4	TGF (4w)	3	1	day7	681827	2.973	0.000436035	0.0817358		Donor 5	TGF (4w)	3	1	day7	694516	61.683	0.00888143	0.0321939
	Donor 3	TGF (4w)	1	2	day7	1.31775e+06	4244.95	0.322136			Donor 4	TGF (4w)	1	2	day7	977196	2085.32	0.213398			Donor 5	TGF (4w)	1	2	day7	842803	997.325	0.118334
	Donor 3	TGF (4w)	2	2	day7	1.38223e+06	5651.01	0.408834			Donor 4	TGF (4w)	2	2	day7	781228	265.309	0.0339605			Donor 5	TGF (4w)	2	2	day7	506513	422.117	0.0833378
	Donor 3	TGF (4w)	3	2	day7	1.11873e+06	1544.29	0.13804			Donor 4	TGF (4w)	3	2	day7	656810	188.02	0.0286263			Donor 5	TGF (4w)	3	2	day7	786871	71.344	0.0090668
	Donor 3	TGF (4w)	1	3	day7	1.55982e+06	6619.35	0.424368			Donor 4	TGF (4w)	1	3	day7	848245	56.48	0.00665846			Donor 5	TGF (4w)	1	3	day7	873493	352.259	0.0403276
	Donor 3	TGF (4w)	2	3	day7	1.3242e+06	2007.28	0.151585			Donor 4	TGF (4w)	2	3	day7	1.03096e+06	96.611	0.009371			Donor 5	TGF (4w)	2	3	day7	482091	758.026	0.157237
	Donor 3	TGF (4w)	3	3	day7	1.51378e+06	5453.33	0.360246			Donor 4	TGF (4w)	3	3	day7	1.61598e+06	3492.87	0.216145			Donor 5	TGF (4w)	3	3	day7	858148	674.792	0.0786335
	Donor 3	TGF (4w)	1	1	day14	1.52776e+06	3177.02	0.207953	0.242459		Donor 4	TGF (4w)	1	1	day14	1.61598e+06	3492.87	0.216145	0.230161		Donor 5	TGF (4w)	1	1	day14	882479	302.467	0.0342747	0.0206341
	Donor 3	TGF (4w)	2	1	day14	1.03913e+06	1105.08	0.106347	0.123675		Donor 4	TGF (4w)	2	1	day14	1.87942e+06	7774.97	0.413689	0.189175		Donor 5	TGF (4w)	2	1	day14	443713	159.78	0.0360098	0.0232046
	Donor 3	TGF (4w)	3	1	day14	1.8642e+06	7521.2	0.403455	0.293805		Donor 4	TGF (4w)	3	1	day14	1.05479e+06	833.829	0.0790515	0.25976		Donor 5	TGF (4w)	3	1	day14	285069	384.958	0.13504	0.0518162
	Donor 3	TGF (4w)	1	2	day14	2.07006e+06	4012.34	0.193827			Donor 4	TGF (4w)	1	2	day14	1.48814e+06	4551.87	0.305877			Donor 5	TGF (4w)	1	2	day14	1.74986e+06	173.9	0.00993794
	Donor 3	TGF (4w)	2	2	day14	1.64016e+07	8615.78	0.05253			Donor 4	TGF (4w)	2	2	day14	1.61626e+06	847.206	0.0524176			Donor 5	TGF (4w)	2	2	day14	1.33784e+06	305.44	0.0228308
	Donor 3	TGF (4w)	3	2	day14	1.5546e+06	2558.71	0.16459			Donor 4	TGF (4w)	3	2	day14	2.25764e+06	10990.6	0.486819			Donor 5	TGF (4w)	3	2	day14	1.60701e+06	248.216	0.0154458
	Donor 3	TGF (4w)	1	3	day14	1.97457e+06	6429.13	0.325596			Donor 4	TGF (4w)	1	3	day14	1.38698e+06	2336.5	0.16846			Donor 5	TGF (4w)	1	3	day14	1.33175e+06	235.583	0.0176898
	Donor 3	TGF (4w)	2	3	day14	1.73216e+06	3674.74	0.212148			Donor 4	TGF (4w)	2	3	day14	1.63919e+06	1662.45	0.101419			Donor 5	TGF (4w)	2	3	day14	1.76597e+06	190.25	0.0107731
	Donor 3	TGF (4w)	3	3	day14	1.61287e+06	5054.22	0.313368			Donor 4	TGF (4w)	3	3	day14	2.00931e+06	4288.05	0.213409			Donor 5	TGF (4w)	3	3	day14	1.72223e+06	85.464	0.00496241
	Donor 3	TGF (2w) + BGP	1	1	day14	928121	239302	25.7835	14.2748		Donor 4	TGF (2w) + BGP	1	1	day14	968880	1907.7	0.196897	3.62759		Donor 5	TGF (2w) + BGP	1	1	day14	1.31739e+06	951.249	0.0722068	0.038177
	Donor 3	TGF (2w) + BGP	2	1	day14	872244	55705.3	6.38643	7.851		Donor 4	TGF (2w) + BGP	2	1	day14	1.47925e+06	674.049	0.0455668	4.41203		Donor 5	TGF (2w) + BGP	2	1	day14	909914	29.727	0.00326701	0.0068079
	Donor 3	TGF (2w) + BGP	3	1	day14	1.86689e+06	934.156	0.0500382	12.2499		Donor 4	TGF (2w) + BGP	3	1	day14	1.92352e+06	127698	6.6388	6.71384		Donor 5	TGF (2w) + BGP	3	1	day14	1.37314e+06	133.769	0.00974186	0.011423
	Donor 3	TGF (2w) + BGP	1	2	day14	1.38505e+06	126933	9.16452			Donor 4	TGF (2w) + BGP	1	2	day14	792211	53064.8	6.69832			Donor 5	TGF (2w) + BGP	1	2	day14	1.99116e+06	793.698	0.0398611
	Donor 3	TGF (2w) + BGP	2	2	day14	1.35363e+06	188341	13.9138			Donor 4	TGF (2w) + BGP	2	2	day14	1.98488e+06	125189	6.30713			Donor 5	TGF (2w) + BGP	2	2	day14	1.36076e+06	222.206	0.0163295
	Donor 3	TGF (2w) + BGP	3	2	day14	401859	142404	35.4364			Donor 4	TGF (2w) + BGP	3	2	day14	812759	60650.3	7.46227			Donor 5	TGF (2w) + BGP	3	2	day14	1.82759e+06	49.049	0.0026838
	Donor 3	TGF (2w) + BGP	1	3	day14	740959	58360.6	7.87635			Donor 4	TGF (2w) + BGP	1	3	day14	1.76125e+06	70231	3.98756			Donor 5	TGF (2w) + BGP	1	3	day14	1.35772e+06	33.442	0.0024631
	Donor 3	TGF (2w) + BGP	2	3	day14	1.67876e+06	54606.1	3.25277			Donor 4	TGF (2w) + BGP	2	3	day14	1.36814e+06	94174.3	6.8834			Donor 5	TGF (2w) + BGP	2	3	day14	1.70705e+06	14.12	0.000827158
	Donor 3	TGF (2w) + BGP	3	3	day14	1.74775e+06	22080.1	1.26334			Donor 4	TGF (2w) + BGP	3	3	day14	1.35973e+06	82134.2	6.04046			Donor 5	TGF (2w) + BGP	3	3	day14	1.84911e+06	403.909	0.0218435
	Donor 3	TGF (4w)	1	1	day21	899773	2225.03	0.247288	0.16456		Donor 4	TGF (4w)	1	1	day21	1.64927e+06	10202.9	0.61863	0.356146		Donor 5	TGF (4w)	1	1	day21	2.07657e+06	39.388	0.00189678	0.138239
	Donor 3	TGF (4w)	2	1	day21	681265	1792.51	0.263115	0.178553		Donor 4	TGF (4w)	2	1	day21	1.56836e+06	2608.5	0.166321	0.212212		Donor 5	TGF (4w)	2	1	day21	1.6421e+06	1879.46	0.114455	0.162268
	Donor 3	TGF (4w)	3	1	day21	346919	350.03	0.100897	0.200502		Donor 4	TGF (4w)	3	1	day21	2.25605e+06	17330.6	0.768183	0.338525		Donor 5	TGF (4w)	3	1	day21	1.57966e+06	3923.9	0.248402	0.218258
	Donor 3	TGF (4w)	1	2	day21	1.41006e+06	2816.59	0.19975			Donor 4	TGF (4w)	1	2	day21	2.55059e+06	8719.53	0.341863			Donor 5	TGF (4w)	1	2	day21	1.35062e+06	5263.08	0.389678
	Donor 3	TGF (4w)	2	2	day21	1.32784e+06	3572.38	0.269037			Donor 4	TGF (4w)	2	2	day21	2.07335e+06	1872.77	0.0903258			Donor 5	TGF (4w)	2	2	day21	1.21477e+06	1247.03	0.102655
	Donor 3	TGF (4w)	3	2	day21	1.12866e+06	5487.52	0.486196			Donor 4	TGF (4w)	3	2	day21	2.41251e+06	409.483	0.0169733			Donor 5	TGF (4w)	3	2	day21	1.37678e+06	161.266	0.0117133
	Donor 3	TGF (4w)	1	3	day21	1.77182e+06	826.397	0.0466411			Donor 4	TGF (4w)	1	3	day21	2.04746e+06	2210.14	0.107945			Donor 5	TGF (4w)	1	3	day21	1.4483e+06	335.166	0.023142
	Donor 3	TGF (4w)	2	3	day21	1.58988e+06	55.737	0.00350574			Donor 4	TGF (4w)	2	3	day21	2.33428e+06	8870.02	0.37999			Donor 5	TGF (4w)	2	3	day21	1.21466e+06	3275.86	0.269693
	Donor 3	TGF (4w)	3	3	day21	2.00081e+06	288.347	0.0144115			Donor 4	TGF (4w)	3	3	day21	1.96128e+06	4519.13	0.230418			Donor 5	TGF (4w)	3	3	day21	1.38291e+06	5457.79	0.39466
	Donor 3	TGF (2w) + BGP	1	1	day21	968246	140911	14.5532	18.9389		Donor 4	TGF (2w) + BGP	1	1	day21	437265	23479.5	5.36962	4.16903		Donor 5	TGF (2w) + BGP	1	1	day21	1.39065e+06	352082	25.3177	19.4571
	Donor 3	TGF (2w) + BGP	2	1	day21	667580	399209	59.7994	38.994		Donor 4	TGF (2w) + BGP	2	1	day21	1.64991e+06	1.1421e+06	69.2219	38.1526		Donor 5	TGF (2w) + BGP	2	1	day21	1.77773e+06	359985	20.2498	16.0934
	Donor 3	TGF (2w) + BGP	3	1	day21	259729	145088	55.8612	33.3712		Donor 4	TGF (2w) + BGP	3	1	day21	1.25252e+06	166497	13.293	12.1778		Donor 5	TGF (2w) + BGP	3	1	day21	1.88928e+06	239272	12.6647	11.6556
	Donor 3	TGF (2w) + BGP	1	2	day21	1.0114e+06	318120	31.4534			Donor 4	TGF (2w) + BGP	1	2	day21	1.07775e+06	51172	4.74803			Donor 5	TGF (2w) + BGP	1	2	day21	1.31408e+06	1550.98	0.118028
	Donor 3	TGF (2w) + BGP	2	2	day21	1.11967e+06	486394	43.4409			Donor 4	TGF (2w) + BGP	2	2	day21	1.99633e+06	705961	35.363			Donor 5	TGF (2w) + BGP	2	2	day21	1.70441e+06	281059	16.4901
	Donor 3	TGF (2w) + BGP	3	2	day21	1.42192e+06	200027	14.0673			Donor 4	TGF (2w) + BGP	3	2	day21	1.63803e+06	207586	12.6729			Donor 5	TGF (2w) + BGP	3	2	day21	1.84146e+06	86782.1	4.71268
	Donor 3	TGF (2w) + BGP	1	3	day21	1.94575e+06	210335	10.81			Donor 4	TGF (2w) + BGP	1	3	day21	1.56102e+06	37299.3	2.38943			Donor 5	TGF (2w) + BGP	1	3	day21	1.26115e+06	415366	32.9357
	Donor 3	TGF (2w) + BGP	2	3	day21	1.48261e+06	203737	13.7417			Donor 4	TGF (2w) + BGP	2	3	day21	2.13905e+06	211188	9.87294			Donor 5	TGF (2w) + BGP	2	3	day21	1.88128e+06	217106	11.5404
	Donor 3	TGF (2w) + BGP	3	3	day21	1.59655e+06	481919	30.1851			Donor 4	TGF (2w) + BGP	3	3	day21	1.81811e+06	192130	10.5676			Donor 5	TGF (2w) + BGP	3	3	day21	1.55459e+06	273442	17.5893
	Donor 3	TGF (2w)	1	1	day21	454962	133.769	0.0294022	0.0240382		Donor 4	TGF (2w)	1	1	day21	638637	150.862	0.0236225	0.0672888		Donor 5	TGF (2w)	1	1	day21	2.21168e+06	188.763	0.00853483	0.00894863
	Donor 3	TGF (2w)	2	1	day21	993670	2271.85	0.228632	0.088495		Donor 4	TGF (2w)	2	1	day21	919728	106.272	0.0115547	0.0366795		Donor 5	TGF (2w)	2	1	day21	1.63791e+06	393.133	0.0240022	0.020565
	Donor 3	TGF (2w)	3	1	day21	929471	1146.7	0.123371	0.0444196		Donor 4	TGF (2w)	3	1	day21	1.1085e+06	1047.12	0.0944624	0.085281		Donor 5	TGF (2w)	3	1	day21	1.89503e+06	286.861	0.0151375	0.0168013
	Donor 3	TGF (2w)	1	2	day21	1.28593e+06	379.013	0.0294739			Donor 4	TGF (2w)	1	2	day21	964721	1284.18	0.133115			Donor 5	TGF (2w)	1	2	day21	1.92886e+06	325.505	0.0168755
	Donor 3	TGF (2w)	2	2	day21	1.86761e+06	605.678	0.0324307			Donor 4	TGF (2w)	2	2	day21	1.00141e+06	555.143	0.0554359			Donor 5	TGF (2w)	2	2	day21	1.87808e+06	503.864	0.0268287
	Donor 3	TGF (2w)	3	2	day21	1.54248e+06	61.683	0.00399894			Donor 4	TGF (2w)	3	2	day21	995993	380.499	0.038203			Donor 5	TGF (2w)	3	2	day21	1.51669e+06	479.34	0.0316044
	Donor 3	TGF (2w)	1	3	day21	2.0153e+06	266.795	0.0132384			Donor 4	TGF (2w)	1	3	day21	900644	406.454	0.0451293			Donor 5	TGF (2w)	1	3	day21	1.81185e+06	26.011	0.00143561
	Donor 3	TGF (2w)	2	3	day21	1.89904e+06	83.977	0.00442207			Donor 4	TGF (2w)	2	3	day21	820025	353.002	0.0430478			Donor 5	TGF (2w)	2	3	day21	2.55153e+06	277.2	0.0108641
	Donor 3	TGF (2w)	3	3	day21	1.99399e+06	117.42	0.0058887			Donor 4	TGF (2w)	3	3	day21	971485	1196.65	0.123178			Donor 5	TGF (2w)	3	3	day21	2.3135e+06	84.721	0.00366203
	Donor 3	TGF (4w)	1	1	day28	691879	75.803	0.0109561	0.0223141		Donor 4	TGF (4w)	1	1	day28	1.22062e+06	996.581	0.0816452	0.0354518		Donor 5	TGF (4w)	1	1	day28	590972	269.768	0.0456482	0.0249904
	Donor 3	TGF (4w)	2	1	day28	923474	252.675	0.0273614	0.112502		Donor 4	TGF (4w)	2	1	day28	374144	55.737	0.0148972	0.106953		Donor 5	TGF (4w)	2	1	day28	1.70515e+06	2583.98	0.15154	0.107118
	Donor 3	TGF (4w)	3	1	day28	884196	167.248	0.0189153	0.0151139		Donor 4	TGF (4w)	3	1	day28	1.30955e+06	85.464	0.0065262	0.0169516		Donor 5	TGF (4w)	3	1	day28	475961	434.007	0.0911854	0.0570515
	Donor 3	TGF (4w)	1	2	day28	980699	359.691	0.036677			Donor 4	TGF (4w)	1	2	day28	1.37653e+06	85.464	0.00620864			Donor 5	TGF (4w)	1	2	day28	2.22977e+06	499.405	0.0223971
	Donor 3	TGF (4w)	2	2	day28	1.23471e+06	3743.31	0.303174			Donor 4	TGF (4w)	2	2	day28	1.81277e+06	44.59	0.00245977			Donor 5	TGF (4w)	2	2	day28	1.53572e+06	2213.14	0.144111
	Donor 3	TGF (4w)	3	2	day28	980175	82.1195	0.00837804			Donor 4	TGF (4w)	3	2	day28	1.4109e+06	109.245	0.00774294			Donor 5	TGF (4w)	3	2	day28	2.33015e+06	1758.32	0.0754595
	Donor 3	TGF (4w)	1	3	day28	1.04301e+06	201.397	0.0193092			Donor 4	TGF (4w)	1	3	day28	1.20763e+06	223.43	0.0185015			Donor 5	TGF (4w)	1	3	day28	1.47001e+06	101.813	0.006926
	Donor 3	TGF (4w)	2	3	day28	1.26847e+06	88.436	0.00697185			Donor 4	TGF (4w)	2	3	day28	1.64916e+06	5005.2	0.303501			Donor 5	TGF (4w)	2	3	day28	1.92274e+06	494.203	0.0257031
	Donor 3	TGF (4w)	3	3	day28	1.12416e+06	202.894	0.0180484			Donor 4	TGF (4w)	3	3	day28	1.30816e+06	478.597	0.0365856			Donor 5	TGF (4w)	3	3	day28	2.15885e+06	97.354	0.00450954
	Donor 3	TGF (2w) + BGP	1	1	day28	588951	346819	58.8877	38.4892		Donor 4	TGF (2w) + BGP	1	1	day28	325069	272900	83.9513	68.6222		Donor 5	TGF (2w) + BGP	1	1	day28	851131	559080	65.6867	38.6276
	Donor 3	TGF (2w) + BGP	2	1	day28	1.1074e+06	374539	33.8215	23.338		Donor 4	TGF (2w) + BGP	2	1	day28	1.13645e+06	858764	75.5658	68.0185		Donor 5	TGF (2w) + BGP	2	1	day28	883262	294358	33.3262	21.6883
	Donor 3	TGF (2w) + BGP	3	1	day28	185797	14565.2	7.83932	9.42602		Donor 4	TGF (2w) + BGP	3	1	day28	98128	65899.2	67.1564	44.1994		Donor 5	TGF (2w) + BGP	3	1	day28	1.5767e+06	206570	13.1014	11.4264
	Donor 3	TGF (2w) + BGP	1	2	day28	1.11309e+06	309408	27.7972			Donor 4	TGF (2w) + BGP	1	2	day28	964770	634991	65.8179			Donor 5	TGF (2w) + BGP	1	2	day28	1.28329e+06	318494	24.8186
	Donor 3	TGF (2w) + BGP	2	2	day28	1.60071e+06	262287	16.3857			Donor 4	TGF (2w) + BGP	2	2	day28	1.04009e+06	718309	69.0619			Donor 5	TGF (2w) + BGP	2	2	day28	1.21276e+06	303471	25.0231
	Donor 3	TGF (2w) + BGP	3	2	day28	953925	102791	10.7756			Donor 4	TGF (2w) + BGP	3	2	day28	1.70468e+06	667998	39.1861			Donor 5	TGF (2w) + BGP	3	2	day28	1.48191e+06	196030	13.2282
	Donor 3	TGF (2w) + BGP	1	3	day28	1.22527e+06	352669	28.7828			Donor 4	TGF (2w) + BGP	1	3	day28	1.55636e+06	873074	56.0972			Donor 5	TGF (2w) + BGP	1	3	day28	1.33827e+06	339622	25.3776
	Donor 3	TGF (2w) + BGP	2	3	day28	1.67657e+06	332071	19.8066			Donor 4	TGF (2w) + BGP	2	3	day28	1.71286e+06	1.01791e+06	59.4276			Donor 5	TGF (2w) + BGP	2	3	day28	1.20974e+06	81241.8	6.71564
	Donor 3	TGF (2w) + BGP	3	3	day28	930793	89943.5	9.66311			Donor 4	TGF (2w) + BGP	3	3	day28	1.45261e+06	381392	26.2556			Donor 5	TGF (2w) + BGP	3	3	day28	1.65413e+06	131497	7.94966
	Donor 3	TGF (2w)	1	1	day28	835461	598.246	0.0716067	0.0362577		Donor 4	TGF (2w)	1	1	day28	1.44576e+06	2512.63	0.173793	0.941635		Donor 5	TGF (2w)	1	1	day28	1.18726e+06	2802.47	0.236045	0.151755
	Donor 3	TGF (2w)	2	1	day28	1.30828e+06	1749.4	0.133718	0.047474		Donor 4	TGF (2w)	2	1	day28	775430	1309.45	0.168868	0.113983		Donor 5	TGF (2w)	2	1	day28	1.33763e+06	2384.81	0.178286	0.0816831
	Donor 3	TGF (2w)	3	1	day28	1.88817e+06	813.02	0.0430587	0.0221138		Donor 4	TGF (2w)	3	1	day28	1.20571e+06	13494.4	1.1192	0.530557		Donor 5	TGF (2w)	3	1	day28	773532	23.124	0.00298941	0.0655851
	Donor 3	TGF (2w)	1	2	day28	1.2969e+06	121.136	0.00934043			Donor 4	TGF (2w)	1	2	day28	1.04243e+06	18948.4	1.81771			Donor 5	TGF (2w)	1	2	day28	1.11917e+06	658.442	0.0588333
	Donor 3	TGF (2w)	2	2	day28	1.58727e+06	40.874	0.00257512			Donor 4	TGF (2w)	2	2	day28	1.35275e+06	791.468	0.058508			Donor 5	TGF (2w)	2	2	day28	1.45313e+06	78.775	0.00542105
	Donor 3	TGF (2w)	3	2	day28	2.15472e+06	243.757	0.0113127			Donor 4	TGF (2w)	3	2	day28	1.7199e+06	1549.49	0.0900921			Donor 5	TGF (2w)	3	2	day28	723367	920.779	0.127291
	Donor 3	TGF (2w)	1	3	day28	2.12593e+06	591.558	0.0278258			Donor 4	TGF (2w)	1	3	day28	988723	8240	0.833398			Donor 5	TGF (2w)	1	3	day28	1.0305e+06	1652.79	0.160388
	Donor 3	TGF (2w)	2	3	day28	1.72171e+06	105.529	0.0061293			Donor 4	TGF (2w)	2	3	day28	1.24767e+06	1429.47	0.114572			Donor 5	TGF (2w)	2	3	day28	1.26535e+06	776.192	0.0613421
	Donor 3	TGF (2w)	3	3	day28	1.42797e+06	170.927	0.0119699			Donor 4	TGF (2w)	3	3	day28	1.17429e+06	4490.22	0.382377			Donor 5	TGF (2w)	3	3	day28	1.56331e+06	1039.21	0.0664752
	Figure 2f, DMB assay						Values in the final chart								Values in the final chart								Values in the final chart
	Donor	Condition		Timepoint	total GAG each pellet (µg)	total DNA each pellet(µg)	GAG/DNA ratio (µg/µg)		Donor	Condition		Timepoint	total GAG each pellet (µg)	total DNA each pellet(µg)	GAG/DNA ratio (µg/µg)		Donor	Condition		Timepoint	total GAG each pellet (µg)	total DNA each pellet(µg)	GAG/DNA ratio (µg/µg)
	Donor 3	TGF (4w)	1	day7	26.4165	0.196222	134.626		Donor 4	TGF (4w)	1	day7	17.326	0.176649	98.0819		Donor 5	TGF (4w)	1	day7	5.11031	0.133164	38.3759
	Donor 3	TGF (4w)	2	day7	33.0213	0.15851	208.323		Donor 4	TGF (4w)	2	day7	13.0364	0.166068	78.5002		Donor 5	TGF (4w)	2	day7	6.05763	0.15662	38.6772
	Donor 3	TGF (4w)	3	day7	29.9888	0.186028	161.206		Donor 4	TGF (4w)	3	day7	17.23	0.169573	101.608		Donor 5	TGF (4w)	3	day7	3.54949	0.142274	24.9482
	Donor 3	TGF (4w)	4	day7	29.4677	0.23075	127.704		Donor 4	TGF (4w)	4	day7	15.8353	0.178909	88.5104		Donor 5	TGF (4w)	4	day7	4.75326	0.120912	39.3119
	Donor 3	TGF (4w)	5	day7	27.2864	0.153873	177.33		Donor 4	TGF (4w)	5	day7	14.524	0.150277	96.6479		Donor 5	TGF (4w)	5	day7	3.72288	0.113586	32.7758
	Donor 3	TGF (4w)	6	day7	26.531	0.168263	157.676		Donor 4	TGF (4w)	6	day7	11.5292	0.177343	65.0107		Donor 5	TGF (4w)	6	day7	10.9527	0.117638	93.1048
	Donor 3	TGF (4w)	1	day14	76.1656	0.2404	316.829		Donor 4	TGF (4w)	1	day14	66.5466	0.190553	349.229		Donor 5	TGF (4w)	1	day14	69.0287	0.140059	492.855
	Donor 3	TGF (4w)	2	day14	85.5776	0.290488	294.599		Donor 4	TGF (4w)	2	day14	62.766	0.163591	383.676		Donor 5	TGF (4w)	2	day14	87.5211	0.212	412.835
	Donor 3	TGF (4w)	3	day14	60.5786	0.158768	381.554		Donor 4	TGF (4w)	3	day14	51.7186	0.198764	260.202		Donor 5	TGF (4w)	3	day14	43.4396	0.14053	309.112
	Donor 3	TGF (4w)	4	day14	56.9571	0.149205	381.736		Donor 4	TGF (4w)	4	day14	58.9122	0.180528	326.332		Donor 5	TGF (4w)	4	day14	58.7643	0.14376	408.767
	Donor 3	TGF (4w)	5	day14	58.6555	0.153614	381.836		Donor 4	TGF (4w)	5	day14	69.6249	0.211294	329.517		Donor 5	TGF (4w)	5	day14	59.7452	0.146139	408.824
	Donor 3	TGF (4w)	6	day14	89.5754	0.198807	450.565		Donor 4	TGF (4w)	6	day14	66.7198	0.199652	334.18		Donor 5	TGF (4w)	6	day14	29.4973	0.132212	223.105
	Donor 3	TGF (2w) + BGP	1	day14	51.1484	0.227813	224.519		Donor 4	TGF (2w) + BGP	1	day14	51.6527	0.203976	253.229		Donor 5	TGF (2w) + BGP	1	day14	25.3912	0.138397	183.467
	Donor 3	TGF (2w) + BGP	2	day14	50.3857	0.211749	237.95		Donor 4	TGF (2w) + BGP	2	day14	40.4315	0.147369	274.356		Donor 5	TGF (2w) + BGP	2	day14	25.2016	0.111168	226.698
	Donor 3	TGF (2w) + BGP	3	day14	20.1385	0.0803121	250.753		Donor 4	TGF (2w) + BGP	3	day14	40.0096	0.17813	224.61		Donor 5	TGF (2w) + BGP	3	day14	19.5059	0.0839635	232.314
	Donor 3	TGF (2w) + BGP	4	day14	20.553	0.0631159	325.64		Donor 4	TGF (2w) + BGP	4	day14	34.4405	0.13932	247.204		Donor 5	TGF (2w) + BGP	4	day14	23.3884	0.130456	179.282
	Donor 3	TGF (2w) + BGP	5	day14	58.6859	0.198956	294.969		Donor 4	TGF (2w) + BGP	5	day14	39.6396	0.194141	204.179		Donor 5	TGF (2w) + BGP	5	day14	25.8813	0.162141	159.622
	Donor 3	TGF (2w) + BGP	6	day14	69.4096	0.0644353	1077.2		Donor 4	TGF (2w) + BGP	6	day14	49.6601	0.175967	282.212		Donor 5	TGF (2w) + BGP	6	day14	26.4109	0.120186	219.751
	Donor 3	TGF (4w)	1	day21	57.7286	0.120797	477.897		Donor 4	TGF (4w)	1	day21	46.6936	0.170495	273.871		Donor 5	TGF (4w)	1	day21	40.2275	0.161398	249.244
	Donor 3	TGF (4w)	2	day21	145.554	0.178637	814.805		Donor 4	TGF (4w)	2	day21	55.5494	0.154633	359.234		Donor 5	TGF (4w)	2	day21	43.9238	0.158978	276.289
	Donor 3	TGF (4w)	3	day21	72.6235	0.122913	590.853		Donor 4	TGF (4w)	3	day21	130.843	0.200881	651.344		Donor 5	TGF (4w)	3	day21	14.6933	0.105246	139.61
	Donor 3	TGF (4w)	4	day21	58.0444	0.225073	257.892		Donor 4	TGF (4w)	4	day21	50.8174	0.176581	287.785		Donor 5	TGF (4w)	4	day21	25.5204	0.0931099	274.089
	Donor 3	TGF (4w)	5	day21	92.5186	0.171677	538.911		Donor 4	TGF (4w)	5	day21	104.026	0.185284	561.443		Donor 5	TGF (4w)	5	day21	23.1889	0.13279	174.628
	Donor 3	TGF (4w)	6	day21	81.4541	0.175445	464.271		Donor 4	TGF (4w)	6	day21	113.8	0.16599	685.582		Donor 5	TGF (4w)	6	day21	28.7243	0.173417	165.637
	Donor 3	TGF (2w) + BGP	1	day21	14.3025	0.0659378	216.909		Donor 4	TGF (2w) + BGP	1	day21	32.0143	0.255335	125.382		Donor 5	TGF (2w) + BGP	1	day21	22.2234	0.162084	137.111
	Donor 3	TGF (2w) + BGP	2	day21	6.73767	0.0392339	171.731		Donor 4	TGF (2w) + BGP	2	day21	42.9609	0.177146	242.516		Donor 5	TGF (2w) + BGP	2	day21	10.3854	0.122417	84.8368
	Donor 3	TGF (2w) + BGP	3	day21	20.9484	0.0524049	399.74		Donor 4	TGF (2w) + BGP	3	day21	18.3677	0.171754	106.942		Donor 5	TGF (2w) + BGP	3	day21	17.2378	0.10727	160.695
	Donor 3	TGF (2w) + BGP	4	day21	8.2629	0.0509233	162.262		Donor 4	TGF (2w) + BGP	4	day21	17.7896	0.122694	144.992		Donor 5	TGF (2w) + BGP	4	day21	24.6712	0.14147	174.392
	Donor 3	TGF (2w) + BGP	5	day21	6.37614	0.0344726	184.963		Donor 4	TGF (2w) + BGP	5	day21	18.8508	0.127659	147.664		Donor 5	TGF (2w) + BGP	5	day21	21.0761	0.125479	167.964
	Donor 3	TGF (2w) + BGP	6	day21	7.95446	0.0455145	174.767		Donor 4	TGF (2w) + BGP	6	day21	33.6966	0.343167	98.1931		Donor 5	TGF (2w) + BGP	6	day21	17.7773	0.0990809	179.422
	Donor 3	TGF (2w)	1	day21	61.3121	0.0820364	747.377		Donor 4	TGF (2w)	1	day21	43.5652	0.182907	238.182		Donor 5	TGF (2w)	1	day21	34.7409	0.139482	249.07
	Donor 3	TGF (2w)	2	day21	106.847	0.178121	599.858		Donor 4	TGF (2w)	2	day21	35.4321	0.172928	204.895		Donor 5	TGF (2w)	2	day21	31.4545	0.135637	231.902
	Donor 3	TGF (2w)	3	day21	78.725	0.18037	436.463		Donor 4	TGF (2w)	3	day21	60.0296	0.201706	297.61		Donor 5	TGF (2w)	3	day21	22.7882	0.156588	145.53
	Donor 3	TGF (2w)	4	day21	100.664	0.161506	623.281		Donor 4	TGF (2w)	4	day21	70.7493	0.180026	392.994		Donor 5	TGF (2w)	4	day21	52.2708	0.133897	390.38
	Donor 3	TGF (2w)	5	day21	87.3431	0.143396	609.105		Donor 4	TGF (2w)	5	day21	71.7928	0.206369	347.886		Donor 5	TGF (2w)	5	day21	35.0358	0.125047	280.182
	Donor 3	TGF (2w)	6	day21	60.3936	0.227184	265.836		Donor 4	TGF (2w)	6	day21	91.7296	0.229065	400.453		Donor 5	TGF (2w)	6	day21	58.4322	0.134135	435.621
	Donor 3	TGF (4w)	1	day28	52.5319	0.231157	227.256		Donor 4	TGF (4w)	1	day28	36.4178	0.120169	303.056		Donor 5	TGF (4w)	1	day28	40.7003	0.143611	283.406
	Donor 3	TGF (4w)	2	day28	45.4551	0.145828	311.702		Donor 4	TGF (4w)	2	day28	66.4858	0.134855	493.018		Donor 5	TGF (4w)	2	day28	51.6037	0.133851	385.531
	Donor 3	TGF (4w)	3	day28	68.4288	0.14078	486.07		Donor 4	TGF (4w)	3	day28	90.4066	0.121893	741.689		Donor 5	TGF (4w)	3	day28	81.1345	0.115372	703.24
	Donor 3	TGF (4w)	4	day28	74.9099	0.109966	681.211		Donor 4	TGF (4w)	4	day28	90.8089	0.121216	749.147		Donor 5	TGF (4w)	4	day28	34.6482	0.103992	333.181
	Donor 3	TGF (4w)	5	day28	27.6945	0.123969	223.399		Donor 4	TGF (4w)	5	day28	41.2217	0.119937	343.695		Donor 5	TGF (4w)	5	day28	35.2266	0.164725	213.851
	Donor 3	TGF (4w)	6	day28	43.5938	0.100472	433.89		Donor 4	TGF (4w)	6	day28	57.0031	0.131713	432.783		Donor 5	TGF (4w)	6	day28	17.392	0.141176	123.194
	Donor 3	TGF (2w) + BGP	1	day28	10.305	0.0620598	166.05		Donor 4	TGF (2w) + BGP	1	day28	13.9344	0.113037	123.273		Donor 5	TGF (2w) + BGP	1	day28	17.3005	0.111175	155.615
	Donor 3	TGF (2w) + BGP	2	day28	15.3135	0.0422211	362.697		Donor 4	TGF (2w) + BGP	2	day28	18.4524	0.0811871	227.283		Donor 5	TGF (2w) + BGP	2	day28	5.83259	0.0587587	99.2635
	Donor 3	TGF (2w) + BGP	3	day28	17.8932	0.0468102	382.25		Donor 4	TGF (2w) + BGP	3	day28	15.1907	0.068893	220.497		Donor 5	TGF (2w) + BGP	3	day28	7.4581	0.0618155	120.651
	Donor 3	TGF (2w) + BGP	4	day28	4.71262	0.0713771	66.0242		Donor 4	TGF (2w) + BGP	4	day28	16.366	0.0645082	253.704		Donor 5	TGF (2w) + BGP	4	day28	6.18371	0.0622848	99.2811
	Donor 3	TGF (2w) + BGP	5	day28	3.54006	0.101657	34.8237		Donor 4	TGF (2w) + BGP	5	day28	18.4428	0.115617	159.516		Donor 5	TGF (2w) + BGP	5	day28	14.8017	0.157233	94.1388
	Donor 3	TGF (2w) + BGP	6	day28	7.86956	0.0935905	84.0851		Donor 4	TGF (2w) + BGP	6	day28	19.7873	0.0786641	251.542		Donor 5	TGF (2w) + BGP	6	day28	18.1164	0.127738	141.825
	Donor 3	TGF (2w)	1	day28	45.0423	0.10096	446.14		Donor 4	TGF (2w)	1	day28	28.5517	0.108649	262.789		Donor 5	TGF (2w)	1	day28	16.7262	0.125301	133.489
	Donor 3	TGF (2w)	2	day28	125.618	0.160923	780.609		Donor 4	TGF (2w)	2	day28	69.3665	0.114401	606.347		Donor 5	TGF (2w)	2	day28	40.1295	0.135615	295.908
	Donor 3	TGF (2w)	3	day28	73.6712	0.178278	413.239		Donor 4	TGF (2w)	3	day28	87.9038	0.107389	818.554		Donor 5	TGF (2w)	3	day28	15.1056	0.140779	107.3
	Donor 3	TGF (2w)	4	day28	60.9922	0.184767	330.103		Donor 4	TGF (2w)	4	day28	87.2596	0.112584	775.06		Donor 5	TGF (2w)	4	day28	25.0008	0.142739	175.15
	Donor 3	TGF (2w)	5	day28	65.3222	0.147949	441.519		Donor 4	TGF (2w)	5	day28	40.926	0.0885412	462.225		Donor 5	TGF (2w)	5	day28	15.7945	0.114191	138.317
	Donor 3	TGF (2w)	6	day28	68.0532	0.159734	426.041		Donor 4	TGF (2w)	6	day28	57.568	0.101497	567.191		Donor 5	TGF (2w)	6	day28	26.1353	0.135556	192.802
	Figure 2g, FACS live/Dead assay
	Percentages of FACS live/Dead assay
	Group	Dead cells percentage(%)	Ave.	Std.
	Day 14 TGF (4w) pellet x 1	8.66	5.685	4.20729
	Day 14 TGF (4w) pellet x 2	2.71
	Day 14 TGF (2w) + BGP pellet x 1	18.6	9.57667	7.93448
	Day 14 TGF (2w) + BGP pellet x 2	3.69
	Day 14 TGF (2w) + BGP pellet x 3	6.44
	Day 28 TGF (4w) pellet x 1	9.18	8.47	1.00409
	Day 28 TGF (4w) pellet x 2	7.76
	Day 28 TGF (2w) + BGP pellet x 1	33.9	34.7333	8.08229
	Day 28 TGF (2w) + BGP pellet x 2	27.1
	Day 28 TGF (2w) + BGP pellet x 3	43.2
	Day 28 TGF (2w) pellet x 1	6.88	7.29	0.579828
	Day 28 TGF (2w) pellet x 2	7.7

## Sheet: Figure 3
		Figure 3c, PCR analysis of Collagen II
		Raw Ct. value of Collagen II
		Donor 3							Donor 4							Donor 5
		Groups	Days	COL2 Ct.	B2M Ct.	Delta	mRNA ralative expression values		Groups	Days	COL2 Ct.	B2M Ct.	Delta	mRNA ralative expression values		Groups	Days	COL2 Ct.	B2M Ct.	Delta	mRNA ralative expression values
		TGF (4w)	Day7 R1	19.6788	19.5078	0.170978	0.88824		TGF (4w)	Day7 R1	21.766	22.7533	-0.987339	1.98252		TGF (4w)	Day7 R1	22.5687	23.2745	0.705793	0.613106
		TGF (4w)	Day7 R2	18.2182	19.8841	-1.66587	3.17305		TGF (4w)	Day7 R2	19.5468	21.6419	-2.09508	4.27249		TGF (4w)	Day7 R2	22.6079	26.1676	3.5597	0.0848053
		TGF (4w)	Day7 R3	19.207	20.0759	-0.868873	1.82624		TGF (4w)	Day7 R3	19.3517	21.2864	-1.93473	3.82307		TGF (4w)	Day7 R3	22.1933	29.7234	7.53009	0.00541025
		TGF (4w)	Day14 R1	17.8704	19.8953	-2.02491	4.06966		TGF (4w)	Day14 R1	21.036	21.1729	-0.136905	1.09954		TGF (4w)	Day14 R1	21.3559	18.1547	-3.20119	9.19715
		TGF (4w)	Day14 R2	18.162	20.1156	-1.95367	3.87358		TGF (4w)	Day14 R2	19.6814	20.7113	-1.02989	2.04187		TGF (4w)	Day14 R2	21.5434	18.2768	-3.26666	9.62412
		TGF (4w)	Day14 R3	20.7188	20.011	0.707804	0.612251		TGF (4w)	Day14 R3	17.5994	20.4955	-2.89611	7.44416		TGF (4w)	Day14 R3	21.3182	18.1567	-3.16144	8.94724
		TGF (2w) + BGP	Day14 R6	21.8569	19.3279	2.52897	0.173262		TGF (2w) + BGP	Day14 R6	17.9173	19.3057	-1.38839	2.61787		TGF (2w) + BGP	Day14 R6	22.6618	19.9975	-2.66431	6.33924
		TGF (2w) + BGP	Day14 R7	22.0321	18.4965	3.53563	0.086232		TGF (2w) + BGP	Day14 R7	19.4949	19.4866	0.00829299	0.994268		TGF (2w) + BGP	Day14 R7	21.2188	19.0572	-2.16165	4.47426
		TGF (2w) + BGP	Day14 R8	24.7017	19.109	5.59266	0.0207225		TGF (2w) + BGP	Day14 R8	20.7127	20.7945	-0.0818169	1.05835		TGF (2w) + BGP	Day14 R8	21.6072	18.7459	-2.86129	7.26663
		TGF (2w) + BGP	Day14 R9	21.018	18.3584	2.65961	0.158262		TGF (2w) + BGP	Day14 R9	17.5999	20.2814	-2.68149	6.41519		TGF (2w) + BGP	Day14 R9	22.0457	19.2464	-2.79935	6.96127
		TGF (2w) + BGP	Day14 R10	24.1819	23.0833	1.09855	0.466984		TGF (2w) + BGP	Day14 R10	20.1773	20.0929	0.0843609	0.943202		TGF (2w) + BGP	Day14 R10	21.4745	19.2711	-2.20335	4.60549
		TGF (4w)	Day21 R1	19.1931	19.4047	-0.211626	1.15799		TGF (4w)	Day21 R1	21.1677	19.7764	1.39136	0.381206		TGF (4w)	Day21 R1	23.4172	23.3019	-0.11536	1.08325
		TGF (4w)	Day21 R2	18.952	20.31	-1.35801	2.56332		TGF (4w)	Day21 R2	20.881	20.3299	0.551093	0.682503		TGF (4w)	Day21 R2	21.2566	18.1945	-3.06213	8.35203
		TGF (4w)	Day21 R3	19.1806	20.2859	-1.10525	2.15136		TGF (4w)	Day21 R3	21.5377	19.302	2.23563	0.212329		TGF (4w)	Day21 R3	21.3504	21.9706	0.620186	0.650587
		TGF (2w) + BGP	Day21 R6	27.6309	20.1686	7.46235	0.00567035		TGF (2w) + BGP	Day21 R6	18.522	19.0804	-0.558433	1.47267		TGF (2w) + BGP	Day21 R6	21.5883	25.1645	3.57621	0.0838406
		TGF (2w) + BGP	Day21 R7	24.0304	18.4194	5.61101	0.0204606		TGF (2w) + BGP	Day21 R7	20.9155	18.8768	2.03872	0.24338		TGF (2w) + BGP	Day21 R7	22.4591	27.2673	4.80818	0.0356939
		TGF (2w) + BGP	Day21 R8	26.9862	18.7648	8.22142	0.00335048		TGF (2w) + BGP	Day21 R8	23.5124	18.6796	4.83273	0.0350917		TGF (2w) + BGP	Day21 R8	23.7233	30.1485	6.4252	0.0116365
		TGF (2w) + BGP	Day21 R9	28.8745	19.4605	9.41399	0.00146591		TGF (2w) + BGP	Day21 R9	19.8356	18.4211	1.4145	0.375141		TGF (2w) + BGP	Day21 R9	22.0019	24.6145	2.61258	0.163507
		TGF (2w) + BGP	Day21 R10	26.1714	19.1251	7.04636	0.00756545		TGF (2w) + BGP	Day21 R10	24.8473	18.4757	6.37164	0.0120766		TGF (2w) + BGP	Day21 R10	22.6842	29.9444	7.26021	0.00652316
		TGF (2w)	Day21 R11	18.0212	19.6927	-1.67151	3.18548		TGF (2w)	Day21 R11	24.0624	19.2977	4.76468	0.0367864		TGF (2w)	Day21 R11	20.0064	21.0949	1.08848	0.470257
		TGF (2w)	Day21 R12	18.3979	20.0597	-1.66182	3.16416		TGF (2w)	Day21 R12	24.6527	19.3113	5.3414	0.0246648		TGF (2w)	Day21 R12	21.3372	24.6721	3.3349	0.0991052
		TGF (2w)	Day21 R13	18.2643	19.8794	-1.61506	3.06325		TGF (2w)	Day21 R13	25.1388	19.4778	5.66097	0.0197642		TGF (2w)	Day21 R13	20.8951	22.5391	1.64402	0.319964
		TGF (4w)	Day28 R1	22.1592	19.1477	3.0115	0.124007		TGF (4w)	Day28 R1	20.3961	19.4916	0.904462	0.534232		TGF (4w)	Day28 R1	20.7846	18.1924	-2.59215	6.02995
		TGF (4w)	Day28 R2	20.2334	19.0959	1.13753	0.454537		TGF (4w)	Day28 R2	22.5509	19.418	3.13295	0.113995		TGF (4w)	Day28 R2	21.1186	18.5128	-2.60583	6.0874
		TGF (4w)	Day28 R3	24.2243	18.4847	5.73958	0.018716		TGF (4w)	Day28 R3	23.0377	19.3788	3.65895	0.0791676		TGF (4w)	Day28 R3	20.4596	18.6259	-1.83374	3.5646
		TGF (2w) + BGP	Day28 R6	28.8294	19.4612	9.36818	0.0015132		TGF (2w) + BGP	Day28 R6	20.7801	19.176	1.60413	0.328935		TGF (2w) + BGP	Day28 R6	25.2544	27.6313	2.3769	0.192522
		TGF (2w) + BGP	Day28 R7	30.2434	21.8362	8.40714	0.00294577		TGF (2w) + BGP	Day28 R7	21.6833	18.7073	2.97608	0.12709		TGF (2w) + BGP	Day28 R7	19.5207	22.7431	3.22235	0.107146
		TGF (2w) + BGP	Day28 R8	26.9007	18.8696	8.0311	0.00382294		TGF (2w) + BGP	Day28 R8	23.7875	19.171	4.61649	0.040766		TGF (2w) + BGP	Day28 R8	21.0233	26.1847	5.16147	0.027941
		TGF (2w) + BGP	Day28 R9	27.0071	19.2028	7.80431	0.00447371		TGF (2w) + BGP	Day28 R9	22.7918	19.4266	3.36522	0.0970438		TGF (2w) + BGP	Day28 R9	22.0588	29.7546	7.69573	0.00482342
		TGF (2w) + BGP	Day28 R10	29.3941	19.0798	10.3143	0.000785379		TGF (2w) + BGP	Day28 R10	24.1257	20.2447	3.88098	0.0678748		TGF (2w) + BGP	Day28 R10	20.695	25.0211	4.32606	0.0498569
		TGF (2w)	Day28 R11	18.0085	19.3166	-1.30808	2.47612		TGF (2w)	Day28 R11	17.6433	19.2831	-1.63985	3.11633		TGF (2w)	Day28 R11	21.3816	22.38	0.998414	0.50055
		TGF (2w)	Day28 R12	18.9952	19.211	-0.215772	1.16132		TGF (2w)	Day28 R12	23.1339	21.1123	2.02158	0.246289		TGF (2w)	Day28 R12	20.6568	21.1465	0.489627	0.712209
		TGF (2w)	Day28 R13	19.073	19.5097	-0.436643	1.35345		TGF (2w)	Day28 R13	25.0683	23.1878	1.88049	0.271592		TGF (2w)	Day28 R13	20.8452	20.1198	-0.725401	1.65336
		Chart values of Collagen II		Days	Day7	Day14	Day21	Day28
			TGF (4w)	Donor 3	0.88824	4.06966	1.15799	0.124007
					3.17305	3.87358	2.56332	0.454537
					1.82624	0.612251	2.15136	0.018716
				Donor 4	1.98252	1.09954	0.381206	0.534232
					4.27249	2.04187	0.682503	0.113995
					3.82307	7.44416	0.212329	0.0791676
				Donor 5	0.613106	9.19715	1.08325	6.02995
					0.0848053	9.62412	8.35203	6.0874
					0.00541025	8.94724	0.650587	3.5646
			TGF (2w)	Donor 3			3.18548	2.47612
							3.16416	1.16132
							3.06325	1.35345
				Donor 4			0.0367864	3.11633
							0.0246648	0.246289
							0.0197642	0.271592
				Donor 5			0.470257	0.50055
							0.0991052	0.712209
							0.319964	1.65336
			TGF (2w) + BGP	Donor 3		0.173262	0.00567035	0.0015132
						0.086232	0.0204606	0.00294577
						0.0207225	0.00335048	0.00382294
						0.158262	0.00146591	0.00447371
						0.466984	0.00756545	0.000785379
				Donor 4		2.61787	1.47267	0.328935
						0.994268	0.24338	0.12709
						1.05835	0.0350917	0.040766
						6.41519	0.375141	0.0970438
						0.943202	0.0120766	0.0678748
				Donor 5		6.33924	0.0838406	0.192522
						4.47426	0.0356939	0.107146
						7.26663	0.0116365	0.027941
						6.96127	0.163507	0.00482342
						4.60549	0.00652316	0.0498569
		Figure 3d, PCR analysis of Collagen X
		Raw Ct. value of Collagen X
		Donor 3							Donor 4							Donor 5
		Groups	Days	COL10 Ct.	B2M Ct.	Delta	mRNA ralative expression values		Groups	Days	COL10 Ct.	B2M Ct.	Delta	mRNA ralative expression values		Groups	Days	COL10 Ct.	B2M Ct.	Delta	mRNA ralative expression values
		TGF (4w)	Day7 R1	19.8726	19.5078	0.364786	0.776584		TGF (4w)	Day7 R1	23.0023	22.7533	0.248998	0.841481		TGF (4w)	Day7 R1	25.2737	22.5687	2.70498	0.153363
		TGF (4w)	Day7 R2	19.2383	19.8841	-0.645798	1.5646		TGF (4w)	Day7 R2	21.4104	21.6419	-0.23149	1.17405		TGF (4w)	Day7 R2	28.2054	22.6079	5.59752	0.0206528
		TGF (4w)	Day7 R3	19.9533	20.0759	-0.122609	1.0887		TGF (4w)	Day7 R3	20.4151	21.2864	-0.871328	1.82935		TGF (4w)	Day7 R3	30.5229	22.1933	8.32966	0.0031083
		TGF (4w)	Day14 R1	18.5612	19.8953	-1.33409	2.52117		TGF (4w)	Day14 R1	21.3554	21.1729	0.182556	0.88114		TGF (4w)	Day14 R1	19.8083	21.3559	-1.54756	2.92323
		TGF (4w)	Day14 R2	18.9991	20.1156	-1.11655	2.16828		TGF (4w)	Day14 R2	20.2709	20.7113	-0.440405	1.35699		TGF (4w)	Day14 R2	20.1717	21.5434	-1.37176	2.58785
		TGF (4w)	Day14 R3	20.4711	20.011	0.460112	0.72693		TGF (4w)	Day14 R3	18.4113	20.4955	-2.0842	4.24039		TGF (4w)	Day14 R3	19.9952	21.3182	-1.32295	2.50177
		TGF (2w) + BGP	Day14 R6	20.5562	19.3279	1.22827	0.426828		TGF (2w) + BGP	Day14 R6	18.5566	19.3057	-0.749063	1.6807		TGF (2w) + BGP	Day14 R6	21.9482	22.6618	-0.713599	1.63989
		TGF (2w) + BGP	Day14 R7	19.9359	18.4965	1.43948	0.368701		TGF (2w) + BGP	Day14 R7	19.8195	19.4866	0.332846	0.793968		TGF (2w) + BGP	Day14 R7	19.9531	21.2188	-1.26575	2.40453
		TGF (2w) + BGP	Day14 R8	21.5391	19.109	2.43014	0.185548		TGF (2w) + BGP	Day14 R8	21.2945	20.7945	0.500006	0.707104		TGF (2w) + BGP	Day14 R8	20.2758	21.6072	-1.33138	2.51644
		TGF (2w) + BGP	Day14 R9	19.6143	18.3584	1.25588	0.418737		TGF (2w) + BGP	Day14 R9	18.3723	20.2814	-1.90914	3.75586		TGF (2w) + BGP	Day14 R9	21.1327	22.0457	-0.913061	1.88304
		TGF (2w) + BGP	Day14 R10	24.3459	23.0833	1.2626	0.416793		TGF (2w) + BGP	Day14 R10	21.2077	20.0929	1.11483	0.461746		TGF (2w) + BGP	Day14 R10	20.309	21.4745	-1.16546	2.24305
		TGF (4w)	Day21 R1	18.7061	19.4047	-0.698611	1.62294		TGF (4w)	Day21 R1	20.5441	19.7764	0.767714	0.587348		TGF (4w)	Day21 R1	24.8476	23.4172	1.43033	0.371047
		TGF (4w)	Day21 R2	19.1087	20.31	-1.20129	2.29945		TGF (4w)	Day21 R2	20.6454	20.3299	0.315443	0.803604		TGF (4w)	Day21 R2	19.8035	21.2566	-1.45317	2.73808
		TGF (4w)	Day21 R3	18.9802	20.2859	-1.30572	2.47207		TGF (4w)	Day21 R3	20.4878	19.302	1.1858	0.43958		TGF (4w)	Day21 R3	23.0311	21.3504	1.68071	0.311928
		TGF (2w) + BGP	Day21 R6	20.4403	20.1686	0.271745	0.828317		TGF (2w) + BGP	Day21 R6	21.5969	19.0804	2.51652	0.174764		TGF (2w) + BGP	Day21 R6	26.4575	21.5883	4.8692	0.0342156
		TGF (2w) + BGP	Day21 R7	21.5934	18.4194	3.17397	0.1108		TGF (2w) + BGP	Day21 R7	24.1513	18.8768	5.27453	0.025835		TGF (2w) + BGP	Day21 R7	28.5045	22.4591	6.04537	0.0151413
		TGF (2w) + BGP	Day21 R8	22.1107	18.7648	3.3459	0.098352		TGF (2w) + BGP	Day21 R8	21.0365	18.6796	2.35687	0.195214		TGF (2w) + BGP	Day21 R8	30.8346	23.7233	7.11138	0.00723203
		TGF (2w) + BGP	Day21 R9	22.0118	19.4605	2.5513	0.170601		TGF (2w) + BGP	Day21 R9	23.0659	18.4211	4.64478	0.0399743		TGF (2w) + BGP	Day21 R9	26.4204	22.0019	4.41851	0.0467623
		TGF (2w) + BGP	Day21 R10	21.0607	19.1251	1.93565	0.261403		TGF (2w) + BGP	Day21 R10	19.4594	18.4757	0.983657	0.505696		TGF (2w) + BGP	Day21 R10	29.3769	22.6842	6.69279	0.00966651
		TGF (2w)	Day21 R11	18.7454	19.6927	-0.947355	1.92833		TGF (2w)	Day21 R11	22.1532	19.2977	2.85546	0.138172		TGF (2w)	Day21 R11	22.306	20.0064	2.29966	0.203111
		TGF (2w)	Day21 R12	19.3183	20.0597	-0.741416	1.67182		TGF (2w)	Day21 R12	20.6396	19.3113	1.32828	0.398242		TGF (2w)	Day21 R12	25.7287	21.3372	4.39151	0.0476457
		TGF (2w)	Day21 R13	18.7586	19.8794	-1.12079	2.17466		TGF (2w)	Day21 R13	21.0317	19.4778	1.55389	0.34059		TGF (2w)	Day21 R13	24.0499	20.8951	3.15484	0.112279
		TGF (4w)	Day28 R1	19.487	19.1477	0.339249	0.790452		TGF (4w)	Day28 R1	18.6277	19.4916	-0.863957	1.82002		TGF (4w)	Day28 R1	20.0979	20.7846	-0.686705	1.6096
		TGF (4w)	Day28 R2	19.0426	19.0959	-0.0532753	1.03762		TGF (4w)	Day28 R2	19.105	19.418	-0.313027	1.24231		TGF (4w)	Day28 R2	19.7708	21.1186	-1.34779	2.54521
		TGF (4w)	Day28 R3	20.9294	18.4847	2.44467	0.183689		TGF (4w)	Day28 R3	20.4539	19.3788	1.07509	0.47464		TGF (4w)	Day28 R3	20.2686	20.4596	-0.191065	1.14161
		TGF (2w) + BGP	Day28 R6	23.1833	19.4612	3.72209	0.0757774		TGF (2w) + BGP	Day28 R6	20.2133	19.176	1.0373	0.487237		TGF (2w) + BGP	Day28 R6	29.2085	25.2544	3.95414	0.0645185
		TGF (2w) + BGP	Day28 R7	23.6964	21.8362	1.86011	0.275456		TGF (2w) + BGP	Day28 R7	20.8774	18.7073	2.17012	0.222193		TGF (2w) + BGP	Day28 R7	22.853	19.5207	3.33228	0.0992848
		TGF (2w) + BGP	Day28 R8	22.717	18.8696	3.84743	0.0694718		TGF (2w) + BGP	Day28 R8	23.0338	19.171	3.86283	0.0687343		TGF (2w) + BGP	Day28 R8	29.8637	21.0233	8.84044	0.00218154
		TGF (2w) + BGP	Day28 R9	22.9991	19.2028	3.79631	0.0719773		TGF (2w) + BGP	Day28 R9	22.0764	19.4266	2.64978	0.159344		TGF (2w) + BGP	Day28 R9	26.3517	22.0588	4.29287	0.0510174
		TGF (2w) + BGP	Day28 R10	25.1994	19.0798	6.11959	0.014382		TGF (2w) + BGP	Day28 R10	22.8599	20.2447	2.61513	0.163218		TGF (2w) + BGP	Day28 R10	25.2396	20.695	4.54456	0.0428501
		TGF (2w)	Day28 R11	19.131	19.3166	-0.18561	1.1373		TGF (2w)	Day28 R11	17.9679	19.2831	-1.31522	2.4884		TGF (2w)	Day28 R11	24.239	21.3816	2.8574	0.137986
		TGF (2w)	Day28 R12	19.3177	19.211	0.106688	0.928718		TGF (2w)	Day28 R12	23.9306	21.1123	2.81824	0.141783		TGF (2w)	Day28 R12	23.2616	20.6568	2.60478	0.164392
		TGF (2w)	Day28 R13	19.648	19.5097	0.138315	0.908579		TGF (2w)	Day28 R13	24.6754	23.1878	1.48764	0.356596		TGF (2w)	Day28 R13	22.1135	20.8452	1.26831	0.415145
		Chart values of Collagen X		Days	Day7	Day14	Day21	Day28
			TGF (4w)	Donor 3	0.776584	2.52117	1.62294	0.790452
					1.5646	2.16828	2.29945	1.03762
					1.0887	0.72693	2.47207	0.183689
				Donor 4	0.841481	0.88114	0.587348	1.82002
					1.17405	1.35699	0.803604	1.24231
					1.82935	4.24039	0.43958	0.47464
				Donor 5	0.153363	2.92323	0.371047	1.6096
					0.0206528	2.58785	2.73808	2.54521
					0.0031083	2.50177	0.311928	1.14161
			TGF (2w)	Donor 3			1.92833	1.1373
							1.67182	0.928718
							2.17466	0.908579
				Donor 4			0.138172	2.4884
							0.398242	0.141783
							0.34059	0.356596
				Donor 5			0.203111	0.137986
							0.0476457	0.164392
							0.112279	0.415145
			TGF (2w) + BGP	Donor 3		0.426828	0.828317	0.0757774
						0.368701	0.1108	0.275456
						0.185548	0.098352	0.0694718
						0.418737	0.170601	0.0719773
						0.416793	0.261403	0.014382
				Donor 4		1.6807	0.174764	0.487237
						0.793968	0.025835	0.222193
						0.707104	0.195214	0.0687343
						3.75586	0.0399743	0.159344
						0.461746	0.505696	0.163218
				Donor 5		1.63989	0.0342156	0.0645185
						2.40453	0.0151413	0.0992848
						2.51644	0.00723203	0.00218154
						1.88304	0.0467623	0.0510174
						2.24305	0.00966651	0.0428501

## Sheet: Figure 4
		Figure 4a, PCR analysis of MMP13 and VEGFA
		Raw Ct. value of MMP13
		Donor 3							Donor 4							Donor 5
		Groups	Days	MMP13 Ct.	B2M Ct.	Delta	mRNA ralative expression values		Groups	Days	MMP13 Ct.	B2M Ct.	Delta	mRNA ralative expression values		Groups	Days	MMP13 Ct.	B2M Ct.	Delta	mRNA ralative expression values
		TGF (4w)	Day7 R1	29.4742	19.5078	9.96636	0.0009996		TGF (4w)	Day7 R1	30.2694	22.7533	7.51607	0.00546307		TGF (4w)	Day7 R1	23.2745	22.5687	0.705793	0.613106
		TGF (4w)	Day7 R2	29.2386	19.8841	9.35452	0.0015276		TGF (4w)	Day7 R2	29.7965	21.6419	8.15463	0.00350922		TGF (4w)	Day7 R2	26.1676	22.6079	3.5597	0.0848053
		TGF (4w)	Day7 R3	30.34	20.0759	10.2641	0.000813224		TGF (4w)	Day7 R3	26.7939	21.2864	5.50741	0.0219838		TGF (4w)	Day7 R3	29.7234	22.1933	7.53009	0.00541025
		TGF (4w)	Day14 R1	28.1565	19.8953	8.26124	0.00325925		TGF (4w)	Day14 R1	27.6441	21.1729	6.47124	0.011271		TGF (4w)	Day14 R1	18.1547	21.3559	-3.20119	9.19715
		TGF (4w)	Day14 R2	28.6072	20.1156	8.49153	0.00277839		TGF (4w)	Day14 R2	25.8838	20.7113	5.17243	0.0277296		TGF (4w)	Day14 R2	18.2768	21.5434	-3.26666	9.62412
		TGF (4w)	Day14 R3	29.0859	20.011	9.07488	0.00185433		TGF (4w)	Day14 R3	24.696	20.4955	4.20053	0.0543896		TGF (4w)	Day14 R3	18.1567	21.3182	-3.16144	8.94724
		TGF (2w) + BGP	Day14 R6	26.9851	19.3279	7.6572	0.00495397		TGF (2w) + BGP	Day14 R6	24.6823	19.3057	5.37661	0.0240701		TGF (2w) + BGP	Day14 R6	19.9975	22.6618	-2.66431	6.33924
		TGF (2w) + BGP	Day14 R7	27.5335	18.4965	9.03701	0.00190366		TGF (2w) + BGP	Day14 R7	25.9397	19.4866	6.4531	0.0114136		TGF (2w) + BGP	Day14 R7	19.0572	21.2188	-2.16165	4.47426
		TGF (2w) + BGP	Day14 R8	29.0038	19.109	9.89482	0.00105042		TGF (2w) + BGP	Day14 R8	26.6861	20.7945	5.89156	0.0168448		TGF (2w) + BGP	Day14 R8	18.7459	21.6072	-2.86129	7.26663
		TGF (2w) + BGP	Day14 R9	26.5895	18.3584	8.23111	0.00332804		TGF (2w) + BGP	Day14 R9	25.6135	20.2814	5.3321	0.0248244		TGF (2w) + BGP	Day14 R9	19.2464	22.0457	-2.79935	6.96127
		TGF (2w) + BGP	Day14 R10	31.8942	23.0833	8.81083	0.00222677		TGF (2w) + BGP	Day14 R10	26.1226	20.0929	6.02966	0.015307		TGF (2w) + BGP	Day14 R10	19.2711	21.4745	-2.20335	4.60549
		TGF (4w)	Day21 R1	27.5166	19.4047	8.11184	0.00361487		TGF (4w)	Day21 R1	25.6489	19.7764	5.87255	0.0170682		TGF (4w)	Day21 R1	23.3019	23.4172	-0.11536	1.08325
		TGF (4w)	Day21 R2	27.7548	20.31	7.44479	0.00573977		TGF (4w)	Day21 R2	26.4589	20.3299	6.12896	0.0142889		TGF (4w)	Day21 R2	18.1945	21.2566	-3.06213	8.35203
		TGF (4w)	Day21 R3	27.4795	20.2859	7.19357	0.00683154		TGF (4w)	Day21 R3	24.3868	19.302	5.08473	0.0294675		TGF (4w)	Day21 R3	21.9706	21.3504	0.620186	0.650587
		TGF (2w) + BGP	Day21 R6	28.7459	20.1686	8.57732	0.00261799		TGF (2w) + BGP	Day21 R6	23.7084	19.0804	4.62799	0.0404425		TGF (2w) + BGP	Day21 R6	25.1645	21.5883	3.57621	0.0838406
		TGF (2w) + BGP	Day21 R7	24.5598	18.4194	6.14043	0.0141758		TGF (2w) + BGP	Day21 R7	24.9822	18.8768	6.10545	0.0145236		TGF (2w) + BGP	Day21 R7	27.2673	22.4591	4.80818	0.0356939
		TGF (2w) + BGP	Day21 R8	28.9889	18.7648	10.2241	0.000836039		TGF (2w) + BGP	Day21 R8	23.8703	18.6796	5.19063	0.027382		TGF (2w) + BGP	Day21 R8	30.1485	23.7233	6.4252	0.0116365
		TGF (2w) + BGP	Day21 R9	30.6085	19.4605	11.148	0.000440672		TGF (2w) + BGP	Day21 R9	24.2516	18.4211	5.8305	0.0175729		TGF (2w) + BGP	Day21 R9	24.6145	22.0019	2.61258	0.163507
		TGF (2w) + BGP	Day21 R10	28.3109	19.1251	9.18587	0.00171703		TGF (2w) + BGP	Day21 R10	24.3687	18.4757	5.89303	0.0168276		TGF (2w) + BGP	Day21 R10	29.9444	22.6842	7.26021	0.00652316
		TGF (2w)	Day21 R11	27.5877	19.6927	7.895	0.00420115		TGF (2w)	Day21 R11	26.2756	19.2977	6.97795	0.00793285		TGF (2w)	Day21 R11	21.0949	20.0064	1.08848	0.470257
		TGF (2w)	Day21 R12	27.4119	20.0597	7.35214	0.00612049		TGF (2w)	Day21 R12	25.0778	19.3113	5.76646	0.0183706		TGF (2w)	Day21 R12	24.6721	21.3372	3.3349	0.0991052
		TGF (2w)	Day21 R13	27.9202	19.8794	8.0408	0.00379732		TGF (2w)	Day21 R13	26.2922	19.4778	6.81431	0.00888566		TGF (2w)	Day21 R13	22.5391	20.8951	1.64402	0.319964
		TGF (4w)	Day28 R1	26.3665	19.1477	7.21876	0.0067133		TGF (4w)	Day28 R1	23.2622	19.4916	3.77058	0.0732725		TGF (4w)	Day28 R1	18.1924	20.7846	-2.59215	6.02995
		TGF (4w)	Day28 R2	25.2586	19.0959	6.16275	0.0139581		TGF (4w)	Day28 R2	23.67	19.418	4.25206	0.052481		TGF (4w)	Day28 R2	18.5128	21.1186	-2.60583	6.0874
		TGF (4w)	Day28 R3	26.1203	18.4847	7.63561	0.00502867		TGF (4w)	Day28 R3	24.5211	19.3788	5.14229	0.028315		TGF (4w)	Day28 R3	18.6259	20.4596	-1.83374	3.5646
		TGF (2w) + BGP	Day28 R6	29.3164	19.4612	9.85518	0.00107968		TGF (2w) + BGP	Day28 R6	26.5555	19.176	7.3795	0.00600551		TGF (2w) + BGP	Day28 R6	27.6313	25.2544	2.3769	0.192522
		TGF (2w) + BGP	Day28 R7	28.2607	21.8362	6.42448	0.0116423		TGF (2w) + BGP	Day28 R7	25.3243	18.7073	6.61699	0.0101879		TGF (2w) + BGP	Day28 R7	22.7431	19.5207	3.22235	0.107146
		TGF (2w) + BGP	Day28 R8	26.2614	18.8696	7.3918	0.00595453		TGF (2w) + BGP	Day28 R8	25.9217	19.171	6.7507	0.00928617		TGF (2w) + BGP	Day28 R8	26.1847	21.0233	5.16147	0.027941
		TGF (2w) + BGP	Day28 R9	28.3837	19.2028	9.18095	0.0017229		TGF (2w) + BGP	Day28 R9	25.9854	19.4266	6.55881	0.0106072		TGF (2w) + BGP	Day28 R9	29.7546	22.0588	7.69573	0.00482342
		TGF (2w) + BGP	Day28 R10	27.0701	19.0798	7.9903	0.00393261		TGF (2w) + BGP	Day28 R10	26.3152	20.2447	6.07046	0.0148802		TGF (2w) + BGP	Day28 R10	25.0211	20.695	4.32606	0.0498569
		TGF (2w)	Day28 R11	27.0315	19.3166	7.71495	0.00475958		TGF (2w)	Day28 R11	25.4002	19.2831	6.11704	0.0144075		TGF (2w)	Day28 R11	22.38	21.3816	0.998414	0.50055
		TGF (2w)	Day28 R12	27.0453	19.211	7.83426	0.00438179		TGF (2w)	Day28 R12	30.3896	21.1123	9.27729	0.0016116		TGF (2w)	Day28 R12	21.1465	20.6568	0.489627	0.712209
		TGF (2w)	Day28 R13	26.6122	19.5097	7.10251	0.00727667		TGF (2w)	Day28 R13	30.1864	23.1878	6.99856	0.00782028		TGF (2w)	Day28 R13	20.1198	20.8452	-0.725401	1.65336
		Chart values of MMP13		Days	Day7	Day14	Day21	Day28
			TGF (4w)	Donor 3	0.0009996	0.00325925	0.00361487	0.0067133
					0.0015276	0.00277839	0.00573977	0.0139581
					0.000813224	0.00185433	0.00683154	0.00502867
				Donor 4	0.00546307	0.011271	0.0170682	0.0732725
					0.00350922	0.0277296	0.0142889	0.052481
					0.0219838	0.0543896	0.0294675	0.028315
				Donor 5	0.613106	9.19715	1.08325	6.02995
					0.0848053	9.62412	8.35203	6.0874
					0.00541025	8.94724	0.650587	3.5646
			TGF (2w)	Donor 3			0.00420115	0.00475958
							0.00612049	0.00438179
							0.00379732	0.00727667
				Donor 4			0.00793285	0.0144075
							0.0183706	0.0016116
							0.00888566	0.00782028
				Donor 5			0.470257	0.50055
							0.0991052	0.712209
							0.319964	1.65336
			TGF (2w) + BGP	Donor 3		0.00495397	0.00261799	0.00107968
						0.00190366	0.0141758	0.0116423
						0.00105042	0.000836039	0.00595453
						0.00332804	0.000440672	0.0017229
						0.00222677	0.00171703	0.00393261
				Donor 4		0.0240701	0.0404425	0.00600551
						0.0114136	0.0145236	0.0101879
						0.0168448	0.027382	0.00928617
						0.0248244	0.0175729	0.0106072
						0.015307	0.0168276	0.0148802
				Donor 5		6.33924	0.0838406	0.192522
						4.47426	0.0356939	0.107146
						7.26663	0.0116365	0.027941
						6.96127	0.163507	0.00482342
						4.60549	0.00652316	0.0498569
		Raw Ct. value of VEGFA
		Donor 3							Donor 4							Donor 5
		Groups	Days	VEGFA Ct.	B2M Ct.	Delta	mRNA ralative expression values		Groups	Days	VEGFA Ct.	B2M Ct.	Delta	mRNA ralative expression values		Groups	Days	VEGFA Ct.	B2M Ct.	Delta	mRNA ralative expression values
		TGF (4w)	Day7 R1	25.057	19.5078	5.54912	0.0213574		TGF (4w)	Day7 R1	27.0326	22.7533	4.27931	0.0514991		TGF (4w)	Day7 R1	26.164	22.5687	3.59535	0.0827357
		TGF (4w)	Day7 R2	24.0211	19.8841	4.13705	0.0568362		TGF (4w)	Day7 R2	25.6934	21.6419	4.05152	0.0603076		TGF (4w)	Day7 R2	26.1097	22.6079	3.50182	0.0882768
		TGF (4w)	Day7 R3	24.7424	20.0759	4.66646	0.0393781		TGF (4w)	Day7 R3	24.228	21.2864	2.94158	0.130165		TGF (4w)	Day7 R3	26.0292	22.1933	3.83587	0.0700304
		TGF (4w)	Day14 R1	24.3138	19.8953	4.41853	0.0467617		TGF (4w)	Day14 R1	26.0259	21.1729	4.85307	0.0346002		TGF (4w)	Day14 R1	23.4776	21.3559	2.12177	0.229765
		TGF (4w)	Day14 R2	24.4514	20.1156	4.33572	0.0495242		TGF (4w)	Day14 R2	25.2941	20.7113	4.58282	0.0417285		TGF (4w)	Day14 R2	24.0972	21.5434	2.55375	0.170311
		TGF (4w)	Day14 R3	25.7661	20.011	5.75512	0.0185155		TGF (4w)	Day14 R3	23.7945	20.4955	3.29903	0.1016		TGF (4w)	Day14 R3	23.8267	21.3182	2.50849	0.175739
		TGF (2w) + BGP	Day14 R6	26.5247	19.3279	7.19676	0.00681646		TGF (2w) + BGP	Day14 R6	23.247	19.3057	3.94133	0.065094		TGF (2w) + BGP	Day14 R6	24.6768	22.6618	2.01501	0.247412
		TGF (2w) + BGP	Day14 R7	24.884	18.4965	6.3875	0.0119445		TGF (2w) + BGP	Day14 R7	23.7252	19.4866	4.2386	0.052973		TGF (2w) + BGP	Day14 R7	23.1929	21.2188	1.97404	0.254539
		TGF (2w) + BGP	Day14 R8	25.9154	19.109	6.80641	0.00893444		TGF (2w) + BGP	Day14 R8	26.1375	20.7945	5.34296	0.0246382		TGF (2w) + BGP	Day14 R8	23.2294	21.6072	1.62223	0.324832
		TGF (2w) + BGP	Day14 R9	24.8645	18.3584	6.50612	0.0110017		TGF (2w) + BGP	Day14 R9	23.4961	20.2814	3.21469	0.107716		TGF (2w) + BGP	Day14 R9	23.6876	22.0457	1.64184	0.320447
		TGF (2w) + BGP	Day14 R10	27.7907	23.0833	4.70732	0.0382786		TGF (2w) + BGP	Day14 R10	25.4462	20.0929	5.35331	0.0244621		TGF (2w) + BGP	Day14 R10	23.2721	21.4745	1.79759	0.287655
		TGF (4w)	Day21 R1	24.6452	19.4047	5.24044	0.0264526		TGF (4w)	Day21 R1	25.0723	19.7764	5.29591	0.0254549		TGF (4w)	Day21 R1	27.624	23.4172	4.20677	0.0541549
		TGF (4w)	Day21 R2	24.1849	20.31	3.87497	0.0681582		TGF (4w)	Day21 R2	25.4381	20.3299	5.10818	0.0289925		TGF (4w)	Day21 R2	23.5932	21.2566	2.33653	0.197985
		TGF (4w)	Day21 R3	24.2056	20.2859	3.91969	0.0660778		TGF (4w)	Day21 R3	25.206	19.302	5.90397	0.0167005		TGF (4w)	Day21 R3	25.4102	21.3504	4.05984	0.0599607
		TGF (2w) + BGP	Day21 R6	27.3757	20.1686	7.20711	0.00676775		TGF (2w) + BGP	Day21 R6	25.7836	19.0804	6.70316	0.0095973		TGF (2w) + BGP	Day21 R6	29.089	21.5883	7.50065	0.00552179
		TGF (2w) + BGP	Day21 R7	25.8242	18.4194	7.40479	0.00590114		TGF (2w) + BGP	Day21 R7	26.9452	18.8768	8.06847	0.00372519		TGF (2w) + BGP	Day21 R7	30.2009	22.4591	7.74176	0.00467195
		TGF (2w) + BGP	Day21 R8	25.4183	18.7648	6.6535	0.00993335		TGF (2w) + BGP	Day21 R8	26.3603	18.6796	7.6807	0.00487393		TGF (2w) + BGP	Day21 R8	32.2633	23.7233	8.54006	0.00268649
		TGF (2w) + BGP	Day21 R9	25.4324	19.4605	5.97187	0.0159326		TGF (2w) + BGP	Day21 R9	26.4381	18.4211	8.01696	0.0038606		TGF (2w) + BGP	Day21 R9	29.2146	22.0019	7.21267	0.00674172
		TGF (2w) + BGP	Day21 R10	25.4079	19.1251	6.28281	0.0128435		TGF (2w) + BGP	Day21 R10	25.0046	18.4757	6.52894	0.0108291		TGF (2w) + BGP	Day21 R10	31.776	22.6842	9.09182	0.00183269
		TGF (2w)	Day21 R11	24.9561	19.6927	5.26331	0.0260367		TGF (2w)	Day21 R11	25.766	19.2977	6.46831	0.0112939		TGF (2w)	Day21 R11	26.2805	20.0064	6.27417	0.0129208
		TGF (2w)	Day21 R12	25.6199	20.0597	5.56022	0.0211937		TGF (2w)	Day21 R12	26.3705	19.3113	7.05921	0.00749838		TGF (2w)	Day21 R12	29.3921	21.3372	8.05483	0.00376057
		TGF (2w)	Day21 R13	25.4713	19.8794	5.59194	0.0207328		TGF (2w)	Day21 R13	25.8413	19.4778	6.36344	0.0121455		TGF (2w)	Day21 R13	26.6158	20.8951	5.72074	0.0189621
		TGF (4w)	Day28 R1	24.5899	19.1477	5.44215	0.0230012		TGF (4w)	Day28 R1	23.6129	19.4916	4.12125	0.057462		TGF (4w)	Day28 R1	23.4653	20.7846	2.68068	0.155967
		TGF (4w)	Day28 R2	24.3326	19.0959	5.23667	0.0265219		TGF (4w)	Day28 R2	23.0696	19.418	3.65166	0.0795684		TGF (4w)	Day28 R2	23.476	21.1186	2.35738	0.195145
		TGF (4w)	Day28 R3	25.8499	18.4847	7.36515	0.00606552		TGF (4w)	Day28 R3	24.706	19.3788	5.32719	0.024909		TGF (4w)	Day28 R3	23.2876	20.4596	2.82799	0.140828
		TGF (2w) + BGP	Day28 R6	29.692	19.4612	10.2308	0.000832169		TGF (2w) + BGP	Day28 R6	26.2469	19.176	7.07094	0.00743765		TGF (2w) + BGP	Day28 R6	33.5879	25.2544	8.33351	0.00310001
		TGF (2w) + BGP	Day28 R7	29.708	21.8362	7.87179	0.00426928		TGF (2w) + BGP	Day28 R7	25.9918	18.7073	7.28453	0.00641415		TGF (2w) + BGP	Day28 R7	25.6017	19.5207	6.08095	0.0147724
		TGF (2w) + BGP	Day28 R8	26.7741	18.8696	7.90456	0.00417341		TGF (2w) + BGP	Day28 R8	28.0676	19.171	8.89657	0.00209828		TGF (2w) + BGP	Day28 R8	29.3856	21.0233	8.36234	0.00303868
		TGF (2w) + BGP	Day28 R9	26.7949	19.2028	7.59216	0.00518243		TGF (2w) + BGP	Day28 R9	27.2303	19.4266	7.80373	0.00447552		TGF (2w) + BGP	Day28 R9	27.4639	22.0588	5.40501	0.0236009
		TGF (2w) + BGP	Day28 R10	27.3855	19.0798	8.30568	0.0031604		TGF (2w) + BGP	Day28 R10	27.6172	20.2447	7.37242	0.00603503		TGF (2w) + BGP	Day28 R10	28.0185	20.695	7.32347	0.00624331
		TGF (2w)	Day28 R11	25.6112	19.3166	6.29461	0.012739		TGF (2w)	Day28 R11	25.6111	19.2831	6.32793	0.0124481		TGF (2w)	Day28 R11	27.6185	21.3816	6.23694	0.0132585
		TGF (2w)	Day28 R12	25.7524	19.211	6.54144	0.0107357		TGF (2w)	Day28 R12	28.5099	21.1123	7.39751	0.00593098		TGF (2w)	Day28 R12	26.7027	20.6568	6.04582	0.0151365
		TGF (2w)	Day28 R13	26.3603	19.5097	6.85065	0.00866463		TGF (2w)	Day28 R13	31.0914	23.1878	7.90362	0.00417613		TGF (2w)	Day28 R13	28.0444	20.8452	7.19918	0.00680506
		Chart values of VEGFA
		Group	Donors	Day7	Day14	Day21	Day28
		TGF (4w)	Donor 3	0.0213574	0.0467617	0.0264526	0.0230012
				0.0568362	0.0495242	0.0681582	0.0265219
				0.0393781	0.0185155	0.0660778	0.00606552
			Donor 4	0.0514991	0.0346002	0.0254549	0.057462
				0.0603076	0.0417285	0.0289925	0.0795684
				0.130165	0.1016	0.0167005	0.024909
			Donor 5	0.0827357	0.229765	0.0541549	0.155967
				0.0882768	0.170311	0.197985	0.195145
				0.0700304	0.175739	0.0599607	0.140828
		TGF (2w)	Donor 3			0.0260367	0.012739
						0.0211937	0.0107357
						0.0207328	0.00866463
			Donor 4			0.0112939	0.0124481
						0.00749838	0.00593098
						0.0121455	0.00417613
			Donor 5			0.0129208	0.0132585
						0.00376057	0.0151365
						0.0189621	0.00680506
		TGF (2w) + BGP	Donor 3		0.00681646	0.00676775	0.000832169
					0.0119445	0.00590114	0.00426928
					0.00893444	0.00993335	0.00417341
					0.0110017	0.0159326	0.00518243
					0.0382786	0.0128435	0.0031604
			Donor 4		0.065094	0.0095973	0.00743765
					0.052973	0.00372519	0.00641415
					0.0246382	0.00487393	0.00209828
					0.107716	0.0038606	0.00447552
					0.0244621	0.0108291	0.00603503
			Donor 5		0.247412	0.00552179	0.00310001
					0.254539	0.00467195	0.0147724
					0.324832	0.00268649	0.00303868
					0.320447	0.00674172	0.0236009
					0.287655	0.00183269	0.00624331
		Figure 4b, ELISA of VEGFA in the conditioned medium
		VEGFA concentration calculation
		donor	Group	dilution	Spectrophotometry Absorption	log (Concentration)	Concentration	Adjusted Concentration	Average
		Donor 3	d7 TGF (4w) 1	1:3	1.4201	2.69152	491.495	1474.48	1412.67
			d7 TGF (4w) 2	1:3	1.3492	2.65349	450.286	1350.86
			d14 TGF (4w) 1	1:3	1.3982	2.6798	478.413	1435.24	1358.41
			d14 TGF (4w) 2	1:3	1.3069	2.63063	427.195	1281.58
			d14 TGF (2w) + BGP 1	1:3	0.3885	1.97065	93.4662	280.399	287.86
			d14 TGF (2w) + BGP 2	1:3	0.4079	1.99317	98.4407	295.322
			d21 TGF (4w) 1	1:3	1.0997	2.5153	327.568	982.703	1018.75
			d21 TGF (4w) 2	1:3	1.1537	2.54605	351.598	1054.79
			d21 TGF (2w) + BGP 1	not diluted	0.16	1.58233	38.2233	38.2233	38.0496
			d21 TGF (2w) + BGP 2	not diluted	0.1585	1.57836	37.8759	37.8759
			d21 TGF (2w) 1	1:3	0.3223	1.88578	76.8736	230.621	232.249
			d21 TGF (2w) 2	1:3	0.3267	1.89187	77.9592	233.877
			d28 TGF (4w) 1	1:3	0.6733	2.23746	172.768	518.305	536.009
			d28 TGF (4w) 2	1:3	0.7114	2.26616	184.571	553.712
			d28 TGF (2w) + BGP 1	not diluted	0.1165	1.45002	28.1851	28.1851	27.7247
			d28 TGF (2w) + BGP 2	not diluted	0.1125	1.4356	27.2644	27.2644
			d28 TGF (2w) 1	1:3	0.142	1.53226	34.0615	102.184	101.181
			d28 TGF (2w) 2	1:3	0.1391	1.52365	33.3923	100.177
		Donor 4	d7 TGF (4w) 1	1:3	0.9131	2.40325	253.075	759.224	774.684
			d7 TGF (4w) 2	1:3	0.9408	2.42058	263.381	790.144
			d14 TGF (4w) 1	1:3	1.0943	2.51219	325.231	975.694	954.091
			d14 TGF (4w) 2	1:3	1.0604	2.49252	310.829	932.488
			d14 TGF (2w) + BGP 1	1:3	0.7607	2.30177	200.34	601.021	627.048
			d14 TGF (2w) + BGP 2	1:3	0.8129	2.33784	217.692	653.075
			d21 TGF (4w) 1	1:3	1.0872	2.5081	322.177	966.532	932.349
			d21 TGF (4w) 2	1:3	1.0327	2.47623	299.388	898.165
			d21 TGF (2w) + BGP 1	not diluted	0.215	1.70807	51.0589	51.0589	47.8254
			d21 TGF (2w) + BGP 2	not diluted	0.1874	1.64926	44.5918	44.5918
			d21 TGF (2w) 1	1:3	0.2704	1.8078	64.2386	192.716	193.185
			d21 TGF (2w) 2	1:3	0.2717	1.80991	64.5514	193.654
			d28 TGF (4w) 1	1:3	1.0072	2.46106	289.105	867.314	862.427
			d28 TGF (4w) 2	1:3	0.999	2.45613	285.847	857.541
			d28 TGF (2w) + BGP 1	not diluted	0.1179	1.45496	28.5073	28.5073	28.9563
			d28 TGF (2w) + BGP 2	not diluted	0.1218	1.46842	29.4052	29.4052
			d28 TGF (2w) 1	1:3	0.1381	1.52063	33.1615	99.4846	104.335
			d28 TGF (2w) 2	1:3	0.1521	1.56104	36.3949	109.185
		Donor 5	d7 TGF (4w) 1	1:3	0.7006	2.25814	181.192	543.576	522.698
			d7 TGF (4w) 2	1:3	0.6552	2.22343	167.273	501.82
			d14 TGF (4w) 1	1:3	0.8285	2.34833	223.015	669.046	639.348
			d14 TGF (4w) 2	1:3	0.7695	2.30796	203.217	609.651
			d14 TGF (2w) + BGP 1	1:3	0.6353	2.20767	161.312	483.936	508.218
			d14 TGF (2w) + BGP 2	1:3	0.6887	2.2492	177.5	532.5
			d21 TGF (4w) 1	1:3	0.7697	2.3081	203.283	609.848	635.033
			d21 TGF (4w) 2	1:3	0.8199	2.34257	220.072	660.217
			d21 TGF (2w) + BGP 1	not diluted	0.1921	1.65981	45.6891	45.6891	45.7475
			d21 TGF (2w) + BGP 2	not diluted	0.1926	1.66092	45.8059	45.8059
			d21 TGF (2w) 1	1:3	0.1771	1.62523	42.1924	126.577	128.777
			d21 TGF (2w) 2	1:3	0.1834	1.64008	43.6592	130.977
			d28 TGF (4w) 1	1:3	0.555	2.14008	138.063	414.189	418.899
			d28 TGF (4w) 2	1:3	0.5661	2.14984	141.203	423.609
			d28 TGF (2w) + BGP 1	not diluted	0.1649	1.59504	39.3589	39.3589	35.799
			d28 TGF (2w) + BGP 2	not diluted	0.1341	1.50838	32.2391	32.2391
			d28 TGF (2w) 1	1:3	0.0972	1.37553	23.743	71.2289	72.6101
			d28 TGF (2w) 2	1:3	0.1012	1.39206	24.6638	73.9913
		Values of VEGFA ELISA in chart
		Group	TGF (4w)			TGF (2w)			TGF (2w) + BGP
		Days	Donor 3	Donor 4	Donor 5	Donor 3	Donor 4	Donor 5	Donor 3	Donor 4	Donor 5
		Day7	1412.67	774.684	522.698
		Day14	1358.41	954.091	639.348				287.86	627.048	508.218
		Day21	1018.75	932.349	635.033	232.249	193.185	128.777	38.0496	47.8254	45.7475
		Day28	536.009	862.427	418.899	101.181	104.335	72.6101	27.7247	28.9563	35.799
		Figure 4c, Migration assay of HUVECs
		Migrated HUVECs in each field (five fields for per well)						Average of migrated HUVECs						Normalized values (Day7 TGF(4w) as "1") in the chart
		Donor 3	Day7	Day14	Day21	Day28		Donor 3	Day7	Day14	Day21	Day28		Donor 3	Day7	Day14	Day21	Day28
		TGF (4w)	223	503	350	273		TGF (4w)	218.8	422.4	349.4	269.8		TGF (4w)	0.693283	1.3384	1.1071	0.85488
			237	381	336	280
			214	472	426	333
			202	414	317	294
			218	342	318	169
			326	475	263	259			338.2	413.2	256.8	231.8			1.07161	1.30925	0.813688	0.734474
			376	506	274	250
			331	434	246	256
			316	323	240	212
			342	328	261	182
			404	324	311	98			389.8	343.2	282.4	212.4			1.23511	1.08745	0.894804	0.673004
			377	367	296	170
			439	358	289	311
			390	342	226	294
			339	325	290	189
		TGF (2w) + BGP		36	193	47		TGF (2w) + BGP		92.2	216.8	110.2		TGF (2w) + BGP		0.292142	0.686946	0.349176
				57	202	158
				77	260	135
				150	248	132
				141	181	79
				177	184	210				188.4	172.2	231.2				0.596958	0.545627	0.732573
				134	162	375
				225	165	254
				196	118	166
				210	232	151
				173	127	167				159.4	132.6	174				0.50507	0.420152	0.551331
				179	121	151
				158	126	275
				155	129	216
				132	160	61
		TGF (2w)			167	437		TGF (2w)			147.4	257.4		TGF (2w)			0.467047	0.815589
					200	271
					132	150
					114	184
					124	245
					185	171					201.4	126.4					0.63815	0.400507
					217	191
					214	63
					194	92
					197	115
					202	135					233.6	202					0.740177	0.640051
					239	268
					227	213
					243	278
					257	116
		Neg.	33					Neg.	30.6					Neg.	0.0969582
			25
			27
			32
			36
			34						74						0.234474
			33
			152
			62
			89
			52						48.4						0.153359
			48
			49
			43
			50
		Migrated HUVECs in each filed						Average of migrated HUVECs						Normalized values (Day7 TGF(4w) as "1")
		Donor 4	Day7	Day14	Day21	Day28		Donor 4	Day7	Day14	Day21	Day28		Donor 4	Day7	Day14	Day21	Day28
		TGF (4w)	735	896	771	656		TGF (4w)	800	818.8	770	566.6		TGF (4w)	1.0721	1.09729	1.03189	0.759314
			793	770	798	486
			838	866	774	514
			801	854	728	527
			833	708	779	650
			704	698	792	688			729	767	743.4	551.6			0.97695	1.02787	0.996248	0.739212
			737	745	696	589
			697	744	777	383
			706	772	804	565
			801	876	648	533
			697	670	811	777			709.6	857	812.8	750.2			0.950951	1.14849	1.08925	1.00536
			538	927	881	758
			839	877	732	690
			669	924	808	750
			805	887	832	776
		TGF (2w) + BGP		856	138	47		TGF (2w) + BGP		832.8	127.8	110.2		TGF (2w) + BGP		1.11605	0.171268	0.147682
				1007	126	158
				821	123	135
				794	120	132
				686	132	79
				968	101	210				946.4	119.4	231.2				1.26829	0.160011	0.309837
				987	130	375
				829	124	254
				1027	124	166
				921	118	151
				815	109	167				852.6	108.8	174				1.14259	0.145805	0.233181
				834	103	151
				886	99	275
				772	118	216
				956	115	61
		TGF (2w)			644	343		TGF (2w)			583.2	263.2		TGF (2w)			0.78156	0.35272
					560	300
					562	205
					622	237
					528	231
					519	270					531.4	285					0.712142	0.381935
					562	315
					544	295
					518	253
					514	292
					520	249					538.6	247.8					0.72179	0.332083
					583	261
					579	232
					506	229
					505	268
		Neg.	19					Neg.	16.8					Neg.	0.0225141
			27
			17
			10
			11
			26						22						0.0294827
			21
			27
			19
			17
			14						22.6						0.0302868
			34
			16
			23
			26
		Migrated HUVECs in each filed						Average of migrated HUVECs						Normalized values (Day7 TGF(4w) as "1")
		Donor 5	Day7	Day14	Day21	Day28		Donor 5	Day7	Day14	Day21	Day28		Donor 5	Day7	Day14	Day21	Day28
		TGF (4w)	115	51	31	82		TGF (4w)	59.2	41.8	30.2	50.8		TGF (4w)	1.56614	1.10582	0.798942	1.34392
			72	35	33	36
			51	29	31	49
			30	40	26	50
			28	54	30	37
			23	49	33	70			24.4	41	36	66.8			0.645503	1.08466	0.952381	1.7672
			31	30	17	51
			16	42	54	60
			24	41	40	77
			28	43	36	76
			46	58	79	60			29.8	43.6	77	56.8			0.78836	1.15344	2.03704	1.50265
			26	41	71	45
			31	43	88	73
			18	39	85	61
			28	37	62	45
		TGF (2w) + BGP		56	51	44		TGF (2w) + BGP		49.8	36.8	37.8		TGF (2w) + BGP		1.31746	0.973545	1
				43	32	36
				43	36	40
				56	44	44
				51	21	25
				158	25	28				92.2	22.2	25.8				2.43915	0.587302	0.68254
				149	26	40
				54	29	21
				50	21	17
				50	10	23
				94	47	42				85.2	37.8	32				2.25397	1	0.846561
				93	28	25
				51	47	32
				83	37	37
				105	30	24
		TGF (2w)			47	20		TGF (2w)			58.8	19.8		TGF (2w)			1.55556	0.52381
					47	18
					45	23
					72	17
					83	21
					39	18					56.2	13.6					1.48677	0.359788
					22	12
					41	14
					91	8
					88	16
					43	12					35.4	14.4					0.936508	0.380952
					34	16
					26	15
					40	20
					34	9
		Neg.	15					Neg.	22.6					Neg.	0.597884
			27
			29
			19
			23
			11						12.4						0.328042
			11
			19
			11
			10
			12						7.8						0.206349
			6
			10
			6
			5
		Figure 4d, EdU proliferation of HUVECs
		Proliferation assay: the number of EdU positive cells 3 fields per well					Proliferation assay: the number of DAPI stain 3 fields per well					Proliferation assay: EdU/DAPI ratio of each well					Proliferation assay: Normalized proliferation ratios (Day7 TGF(4w) as "1")
		Donor 3	Day7	Day14	Day21	Day28	Donor 4	Day7	Day14	Day21	Day28	Donor 5	Day7	Day14	Day21	Day28	Donor 3	Day7	Day14	Day21	Day28
		TGF (4w), well 1	3	5	10	9	TGF (4w), well 1	47	79	53	68	TGF (4w), well 1	0.0970149	0.0784314	0.134328	0.162562	TGF (4w), well 1	0.923375	0.746499	1.27852	1.54724
			2	8	8	20		48	66	68	82
			8	7	9	4		39	110	80	53
		TGF (4w), well 2	8	8	9	5	TGF (4w), well 2	31	73	64	45	TGF (4w), well 2	0.1	0.14359	0.152941	0.186364	TGF (4w), well 2	0.951786	1.36667	1.45567	1.77378
			5	13	11	18		46	80	47	73
			0	7	6	18		53	42	59	102
		TGF (4w), well 3	9	6	21	6	TGF (4w), well 3	38	63	96	63	TGF (4w), well 3	0.118182	0.131707	0.184834	0.0821918	TGF (4w), well 3	1.12484	1.25357	1.75923	0.78229
			5	9	6	7		92	61	55	58
			12	12	12	5		90	81	60	98
		TGF (2w) + BGP, well 1		8	2	3	TGF (2w) + BGP, well 1		83	61	34	TGF (2w) + BGP, well 1		0.131148	0.0362694	0.0642202	TGF (2w) + BGP, well 1		1.24824	0.345208	0.611239
				14	1	2			70	96	37
				10	4	2			91	36	38
		TGF (2w) + BGP, well 2		12	2	3	TGF (2w) + BGP, well 2		63	55	66	TGF (2w) + BGP, well 2		0.147783	0.0858586	0.0584416	TGF (2w) + BGP, well 2		1.40658	0.81719	0.556239
				8	10	3			52	97	58
				10	5	3			88	46	30
		TGF (2w) + BGP, well 3		7	0	2	TGF (2w) + BGP, well 3		49	56	30	TGF (2w) + BGP, well 3		0.123762	0.0359712	0.0526316	TGF (2w) + BGP, well 3		1.17795	0.342369	0.50094
				6	1	1			48	48	37
				12	4	2			105	35	28
		TGF (2w) , well 1			13	7	TGF (2w) , well 1			68	80	TGF (2w) , well 1			0.15566	0.0871795	TGF (2w) , well 1			1.48155	0.829763
					15	3				86	53
					5	7				58	62
		TGF (2w) , well 2			6	3	TGF (2w) , well 2			72	45	TGF (2w) , well 2			0.121547	0.130435	TGF (2w) , well 2			1.15687	1.24146
					8	1				59	35
					8	14				50	58
		TGF (2w) , well 3			13	9	TGF (2w) , well 3			79	47	TGF (2w) , well 3			0.142132	0.114583	TGF (2w) , well 3			1.35279	1.09059
					11	4				82	84
					4	9				36	61
		Neg., well 1	3				Neg., well 1	25				Neg., well 1	0.0821918				Neg., well 1	0.78229
			1					25
			2					23
		Neg., well 2	3				Neg., well 2	18				Neg., well 2	0.0869565				Neg., well 2	0.82764
			2					26
			1					25
		Neg., well 3	0				Neg., well 3	27				Neg., well 3	0.0215054				Neg., well 3	0.204685
			2					32
			0					34
		Proliferation assay: the number of EdU positive cells 3 fields per well					Proliferation assay: the number of DAPI stain 3 fields per well					Proliferation assay: EdU/DAPI ratio of each well					Proliferation assay: Normalized proliferation ratios (Day7 TGF(4w) as "1")
		Donor 4	Day7	Day14	Day21	Day28	Donor 4	Day7	Day14	Day21	Day28	Donor 4	Day7	Day14	Day21	Day28	Donor 4	Day7	Day14	Day21	Day28
		TGF (4w)	10	14	10	21	TGF (4w)	58	88	62	109	TGF (4w)	0.128755	0.152425	0.182163	0.158273	TGF (4w)	0.816468	0.966563	1.15514	1.00365
			4	14	18	26		38	110	102	204
			16	38	68	19		137	235	363	104
			12	32	12	0		49	225	75	93		0.148936	0.155128	0.188011	0.15311		0.94444	0.983705	1.19222	0.970907
			6	19	19	20		92	138	100	48
			17	70	38	12		94	417	192	68
			29	30	8	6		154	161	41	38		0.195402	0.188645	0.178161	0.172932		1.23909	1.19624	1.12976	1.0966
			8	66	32	12		62	335	130	60
			14	7	22	5		45	50	177	35
		TGF (2w) + BGP		17	2	26	TGF (2w) + BGP		84	48	207	TGF (2w) + BGP		0.166939	0.177914	0.126471	TGF (2w) + BGP		1.0586	1.1282	0.80198
				20	10	10			132	73	82
				65	46	7			395	205	51
				22	9	35			115	120	218			0.158537	0.100529	0.152			1.00532	0.637479	0.963868
				11	7	15			65	43	91
				6	3	7			66	26	66
				47	7	11			289	71	165			0.153153	0.113074	0.0821429			0.97118	0.71703	0.520887
				3	7	2			17	86	84
				1	18	10			27	126	31
		TGF (2w)			50	25	TGF (2w)			335	118	TGF (2w)			0.161937	0.139037	TGF (2w)			1.02688	0.881669
					17	8				92	62
					30	19				172	194
					30	22				134	103				0.175799	0.165854				1.11478	1.05172
					6	5				50	39
					41	7				254	63
					22	22				129	104				0.166154	0.133595				1.05362	0.847159
					19	42				109	343
					13	4				87	62
		Neg.	3				Neg.	25				Neg.	0.0821918				Neg.	0.521198
			1					25
			2					23
			3					18					0.0869565					0.551412
			2					26
			1					25
			0					27					0.0215054					0.136371
			2					32
			0					34
		Proliferation assay: the number of EdU positive cells 3 fields per well					Proliferation assay: the number of DAPI stain 3 fields per well					Proliferation assay: EdU/DAPI ratio of each well					Proliferation assay: Normalized proliferation ratios (Day7 TGF(4w) as "1")
		Donor 5	Day7	Day14	Day21	Day28	Donor 5	Day7	Day14	Day21	Day28	Donor 5	Day7	Day14	Day21	Day28	Donor 5	Day7	Day14	Day21	Day28
		TGF (4w)	13	27	19	34	TGF (4w)	101	149	115	201	TGF (4w)	0.141667	0.185542	0.166113	0.141553	TGF (4w)	0.835111	1.09375	0.979219	0.834438
			10	28	8	16		80	176	65	122
			11	22	23	12		59	90	121	115
			14	18	24	18		83	129	120	125		0.156364	0.172727	0.186722	0.158163		0.921748	1.01821	1.10071	0.932356
			13	20	26	16		82	117	148	109
			16	19	40	28		110	84	214	158
			29	11	27	14		124	81	229	126		0.210884	0.160156	0.127551	0.14878		1.24314	0.944105	0.7519	0.877046
			15	11	14	19		74	79	95	104
			18	19	9	28		96	96	68	180
		TGF (2w) + BGP		9	16	8	TGF (2w) + BGP		83	116	58	TGF (2w) + BGP		0.12766	0.156934	0.136	TGF (2w) + BGP		0.75254	0.925112	0.801706
				15	18	12			105	93	98
				12	9	14			94	65	94
				11	16	19			82	103	116			0.115987	0.153846	0.159011			0.683734	0.906907	0.937351
				14	8	14			161	50	73
				12	10	12			76	68	94
				14	18	21			104	118	115			0.141479	0.166667	0.153285			0.834005	0.982483	0.903598
				13	9	13			115	55	76
				17	32	8			92	181	83
		TGF (2w)			27	21	TGF (2w)			155	100	TGF (2w)			0.152091	0.216049	TGF (2w)			0.896562	1.27359
					5	19				38	89
					8	30				70	135
					26	31				121	126				0.17623	0.201102				1.03885	1.18548
					7	13				59	91
					10	29				64	146
					10	12				53	86				0.193133	0.169065				1.1385	0.996619
					16	12				77	76
					19	23				103	116
		Neg.	3				Neg.	45				Neg.	0.109589				Neg.	0.646016
			5					41
			8					60
			11					58					0.202899					1.19607
			11					66
			20					83
			5					32					0.184					1.08466
			6					45
			12					48
		Proliferation assay: Ratio of EdU/DAPI in chart
		Group	Donor	Day 7	Day 14	Day 21	Day 28	Neg.
		TGF (4w)	Donor 3	0.923375	0.746499	1.27852	1.54724
				0.951786	1.36667	1.45567	1.77378
				1.12484	1.25357	1.75923	0.78229
			Donor 4	0.816468	0.966563	1.1282	1.00365
				0.94444	0.983705	1.19222	1.0966
				1.23909	1.19624	1.12976	1.0966
			Donor 5	0.835111	1.09375	0.979219	0.834438
				0.921748	1.01821	1.10071	0.932356
				1.24314	0.944105	0.7519	0.877046
		TGF (2w) + BGP	Donor 3		1.24824	0.345208	0.611239
					1.40658	0.81719	0.556239
					1.17795	0.342369	0.50094
			Donor 4		1.0586	1.1282	0.80198
					1.00532	0.637479	0.963868
					0.97118	0.71703	0.520887
			Donor 5		0.75254	0.925112	0.801706
					0.683734	0.906907	0.937351
					0.834005	0.982483	0.903598
		TGF (2w)	Donor 3			1.48155	0.829763
						1.15687	1.24146
						1.35279	1.09059
			Donor 4			1.02688	0.881669
						1.11478	1.05172
						1.05362	0.847159
			Donor 5			0.896562	1.27359
						1.03885	1.18548
						1.1385	0.996619
		Neg.	Donor 3					0.78229
								0.82764
								0.204685
			Donor 4					0.521198
								0.551412
								0.136371
			Donor 5					0.646016
								1.19607
								1.08466
		Figure 4e, Vessel length density (VLD) quantification
		Vessel length per square
				Total vessel lengths (mm) of each square
			Group (3 duplicates)	Square 1	Square 2	Square 3	Square 4	Square 5	Square 6	Square 7	Square 8	Square 9	Square 10
		Veseel length (mm)	Neg. 1	2.568	2.81252	1.77411	2.71381	1.97332	1.97918	2.3011	1.82853	3.14297	1.41936
			Neg. 2	2.38899	2.07619	1.97062	2.03209	2.27014	1.19143	2.34928	2.83966	2.90133	2.23006
		Square area (0.488 mm * 0.488 mm ) = 0.200704 mm2)	Neg. 3	1.87074	2.62396	2.07183	1.97536	2.62444	2.14506	2.29423	2.38908	2.08817	1.9567
			Day14 TGF(4w) 1	3.77689	3.33078	3.62916	4.13321	3.40773	3.09881	4.01022	3.72215	3.54476	3.92104
			Day14 TGF(4w) 2	3.62937	3.55025	4.01101	3.34646	3.80028	3.80745	3.0221	3.40347	3.37858	3.96859
			Day14 TGF(4w) 3	3.26997	3.57643	3.67185	3.67006	3.48253	3.48663	3.7829	3.44385	3.31221	3.36101
			Day14 TGF(2w) + BGP 1	4.142	3.0152	3.19887	3.08146	3.45246	3.87462	2.80863	3.62814	3.72197	3.82182
			Day14 TGF(2w) + BGP 2	2.83628	3.6255	2.96416	3.42654	3.30549	4.87986	3.6219	3.13362	3.64266	4.2126
			Day14 TGF(2w) + BGP 3	3.61775	3.2683	3.82217	3.33156	3.85082	3.65074	3.27339	3.69185	2.85483	3.71247
			Day28 TGF(4w) 1	2.715	3.78	3.81457	3.2372	3.54406	3.56158	4.41399	4.52747	3.64036	4.38247
			Day28 TGF(4w) 2	2.89979	4.35701	3.78474	3.76102	4.02609	3.45246	4.18559	3.64926	4.18413	4.23137
			Day28 TGF(4w) 3	4.19813	4.13823	3.99634	3.55606	4.13193	4.25149	4.04345	3.40012	3.42243	3.84347
			Day28 TGF(2w) + BGP 1	3.946	3.18803	3.45498	2.28783	2.74044	3.057	2.24712	2.25639	3.70794	2.80837
			Day28 TGF(2w) + BGP 2	3.20297	3.02709	1.54672	2.09797	1.97144	1.96339	3.54991	1.89749	2.67406	3.053
			Day28 TGF(2w) + BGP 3	2.68943	2.03968	2.82362	2.72864	2.72171	3.04835	2.27458	2.62484	2.40186	2.69902
		VLD per squares
				VLD (mm/mm2) of each square
			Group	Square 1	Square 2	Square 3	Square 4	Square 5	Square 6	Square 7	Square 8	Square 9	Square 10	Average
			Neg. 1	12.795	14.0133	8.83942	13.5215	9.83199	9.8612	11.4651	9.11058	15.6597	7.07191	11.217
			Neg. 2	11.9031	10.3445	9.81853	10.1248	11.3109	5.93628	11.7052	14.1485	14.4557	11.1112	11.0859
			Neg. 3	9.3209	13.0738	10.3228	9.84213	13.0762	10.6877	11.4309	11.9035	10.4042	9.74916	10.9811
			Day14 TGF(4w) 1	18.8182	16.5955	18.0822	20.5935	16.9789	15.4397	19.9808	18.5455	17.6616	19.5364	18.2232
			Day14 TGF(4w) 2	18.0832	17.689	19.9847	16.6736	18.9348	18.9705	15.0575	16.9576	16.8337	19.7734	17.8958
			Day14 TGF(4w) 3	16.2925	17.8194	18.2949	18.2859	17.3516	17.372	18.8482	17.1589	16.503	16.7461	17.4672
			Day14 TGF(2w) + BGP 1	20.6374	15.0231	15.9382	15.3533	17.2017	19.3052	13.9939	18.077	18.5446	19.0421	17.3117
			Day14 TGF(2w) + BGP 2	14.1317	18.0639	14.7688	17.0726	16.4695	24.3137	18.046	15.6132	18.1494	20.9891	17.7618
			Day14 TGF(2w) + BGP 3	18.0253	16.2842	19.0438	16.5994	19.1865	18.1897	16.3095	18.3945	14.2241	18.4972	17.4754
			Day28 TGF(4w) 1	13.5274	18.8337	19.006	16.1292	17.6581	17.7455	21.9925	22.5579	18.138	21.8355	18.7424
			Day28 TGF(4w) 2	14.4481	21.7086	18.8573	18.7391	20.0598	17.2018	20.8545	18.1823	20.8473	21.0827	19.1982
			Day28 TGF(4w) 3	20.917	20.6186	19.9116	17.718	20.5872	21.1829	20.1463	16.9409	17.0521	19.15	19.4225
			Day28 TGF(2w) + BGP 1	19.6608	15.8842	17.2143	11.399	13.6541	15.2314	11.1962	11.2424	18.4747	13.9926	14.795
			Day28 TGF(2w) + BGP 2	15.9587	15.0824	7.70648	10.4531	9.82263	9.78252	17.6873	9.45419	13.3234	15.2115	12.4482
			Day28 TGF(2w) + BGP 3	13.4	10.1626	14.0686	13.5953	13.5608	15.1883	11.333	13.0782	11.9672	13.4478	12.9802
		VLD summarized in chart
			SUM	Neg.	11.217	11.0859	10.9811
			Day14	TGF (4w)	18.2232	17.8958	17.4672
				TGF (2w)+ BGP	17.3117	17.7618	17.4754
			Day28	TGF (4w)	18.7424	19.1982	19.4225
				TGF (2w)+ BGP	14.795	12.4482	12.9802
